# Supplementary material for: Assessing the Burden of COVID-19 in Developing Countries: Systematic Review, Meta-Analysis, and Public Policy Implications
Source: bioRxiv or medRxiv preprint supplement (doi:10.1101/2021.09.29.21264325), 2022-03-01

**5: Maranhao, Brazil**

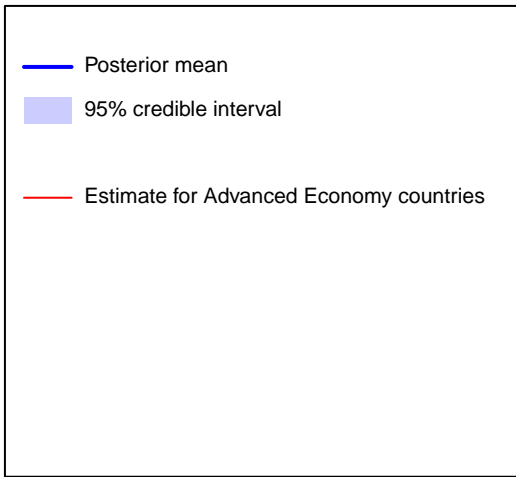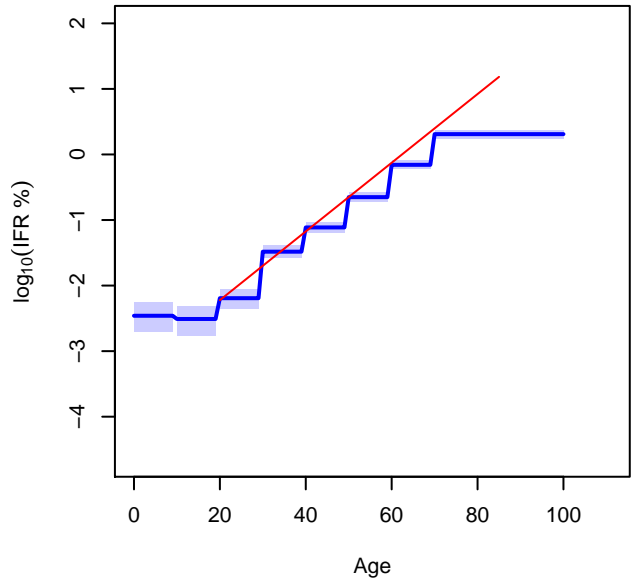

**12: Karnataka, India**

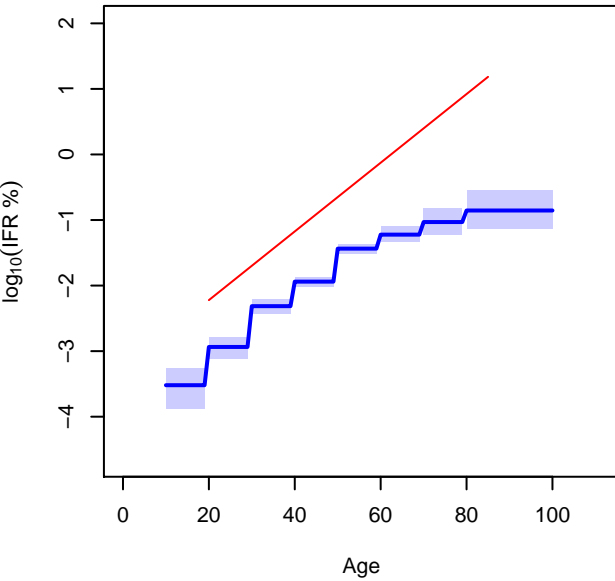

**19: Chennai, India**

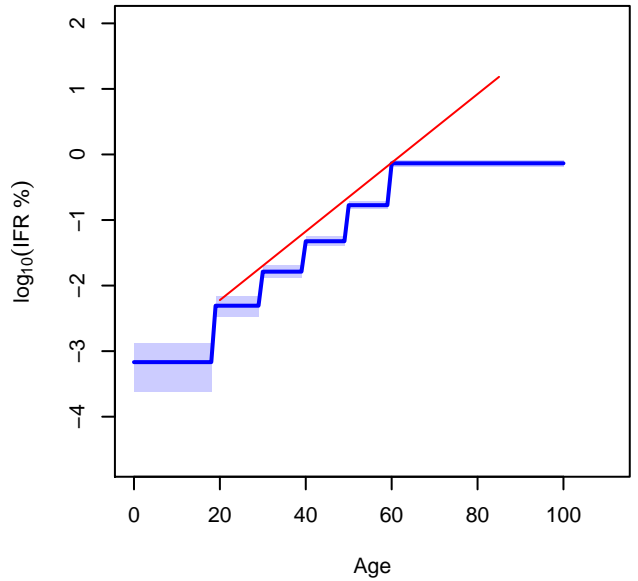

**36: Nairobi County, Kenya**

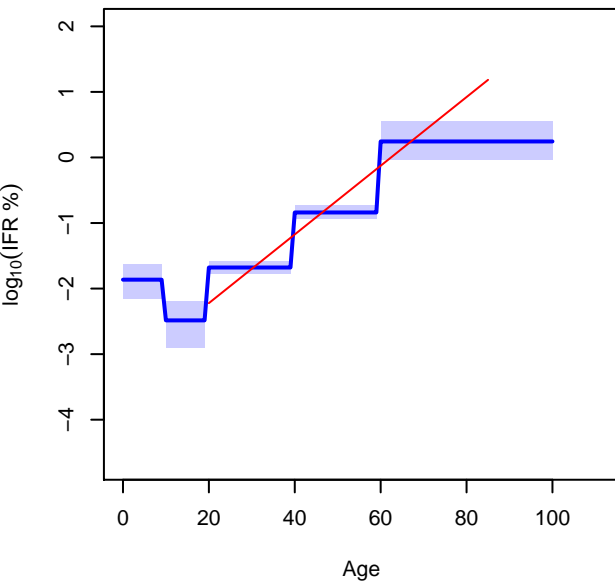

**38: Buenos Aires City, Argentina**

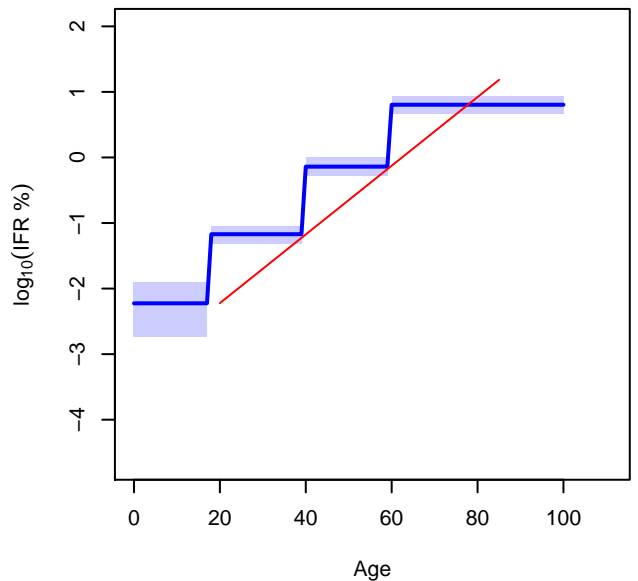

**40: Municipality of Hurlingham, Argentina**

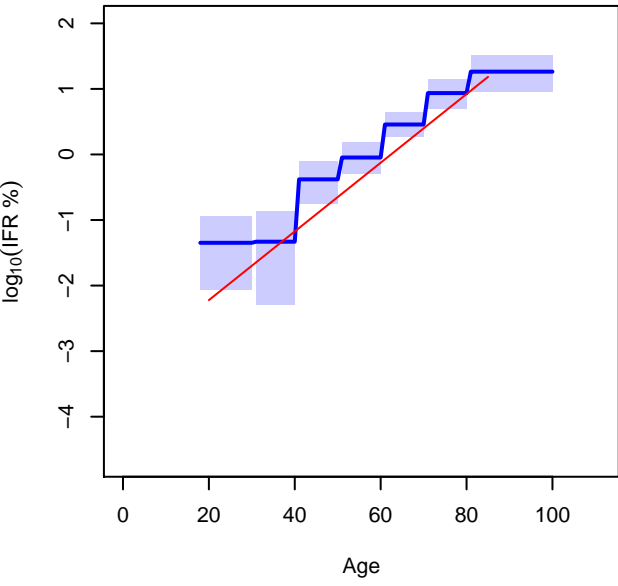

**44: Leticia, Colombia**

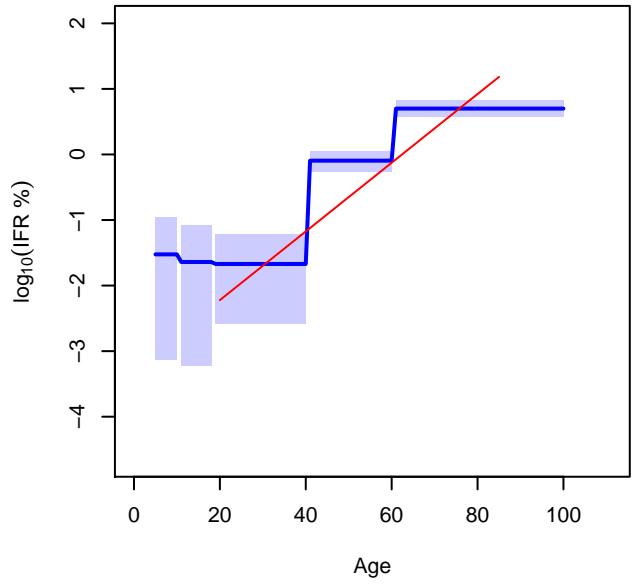

**45: Barranquilla, Colombia**

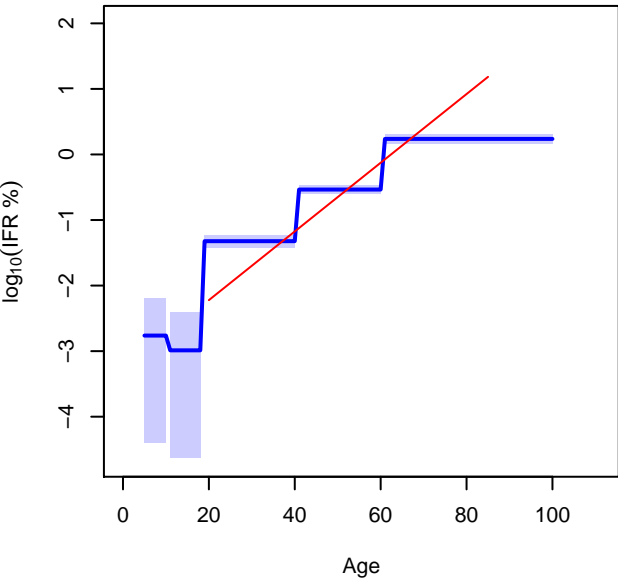

**46: Medellin, Colombia**

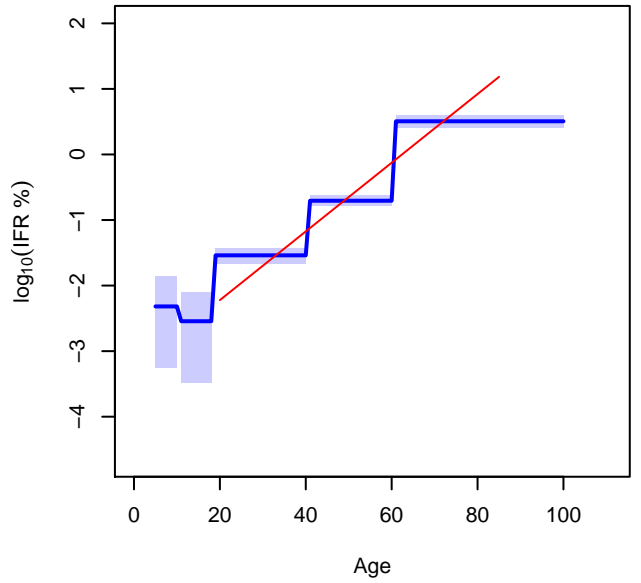

**48: Bucaramanga, Colombia**

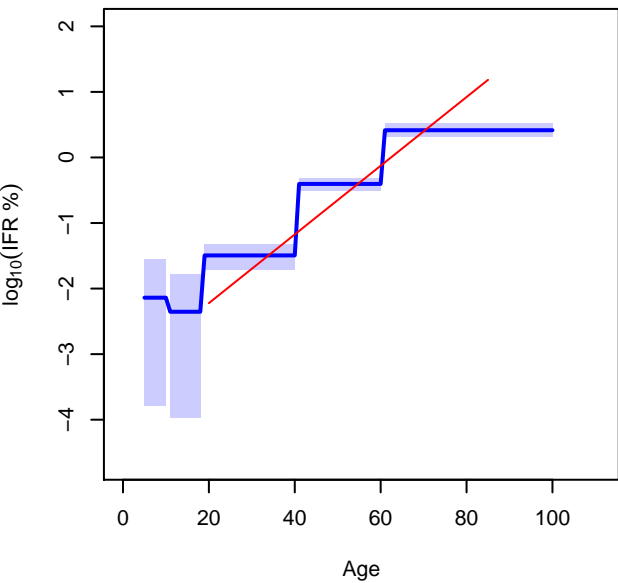

**49: Cucuta, Colombia**

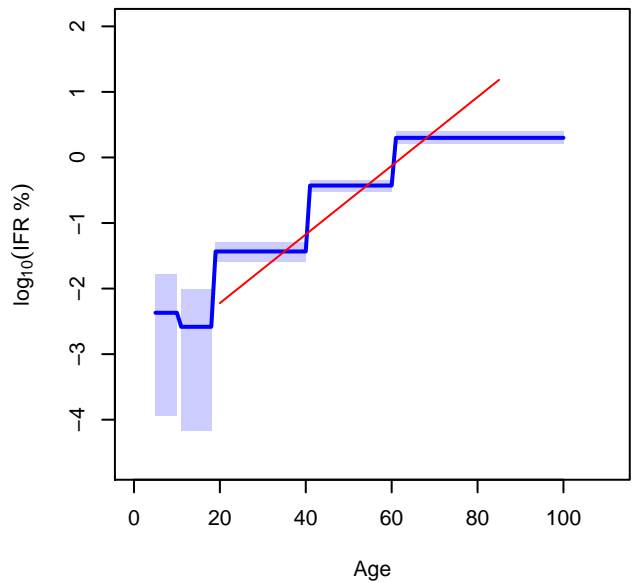

**50: Villavicencio, Colombia**

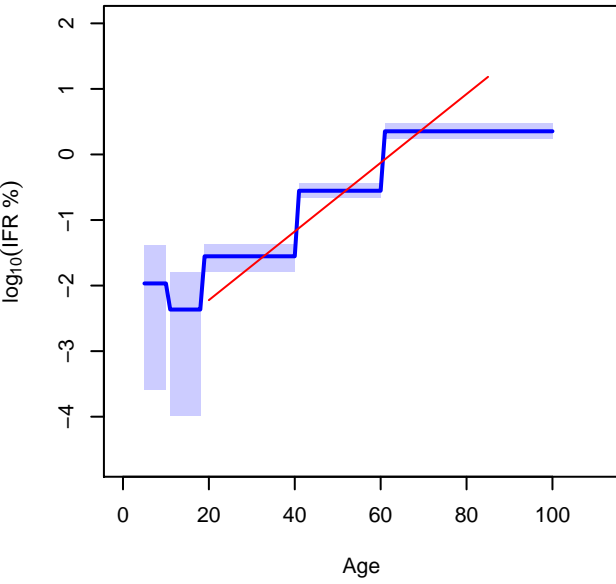

**51: Bogota, Colombia**

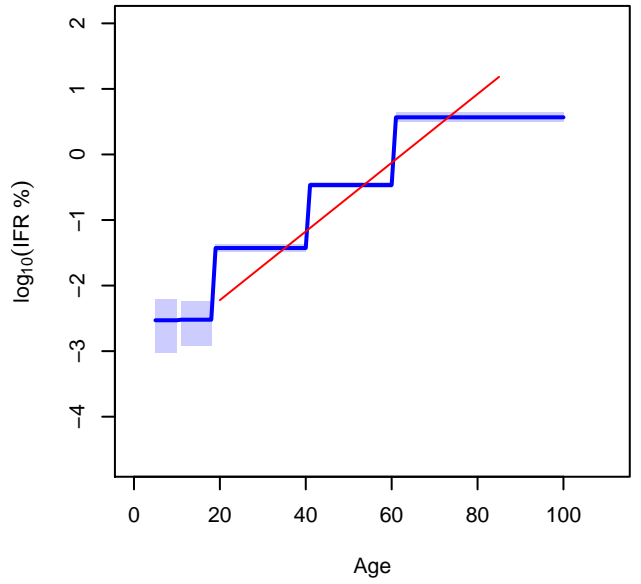

**52: Cali, Colombia**

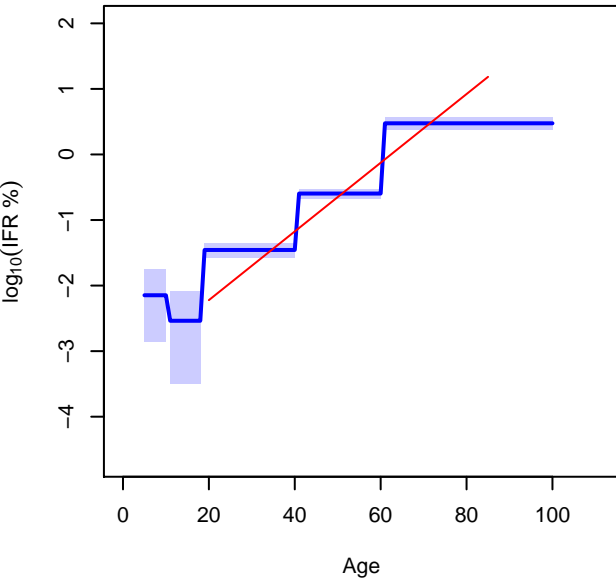

**54: Ipiales, Colombia**

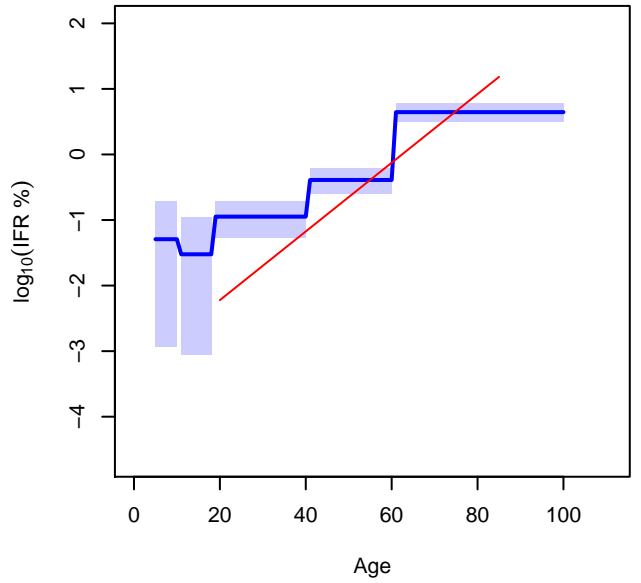

**60: Lambayeque, Peru**

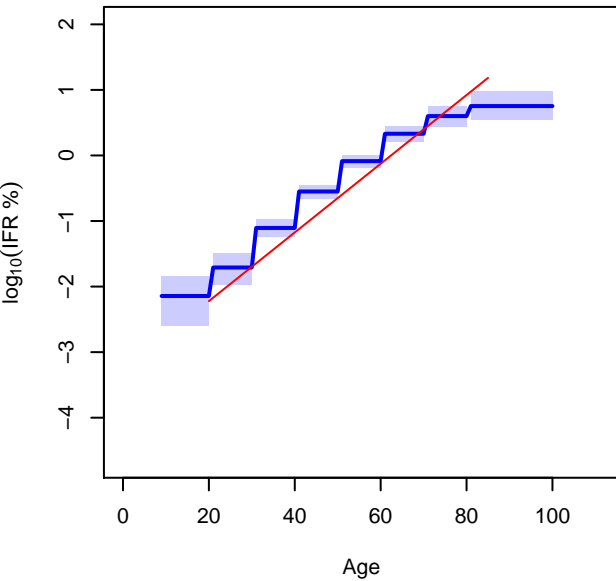

**63: Lima (Metropolitana) + Callao, Peru**

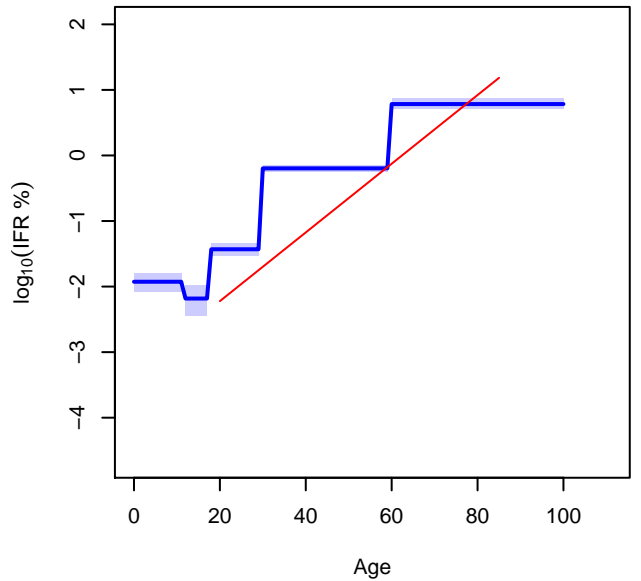

**64: Iquitos, Loreto, Peru**

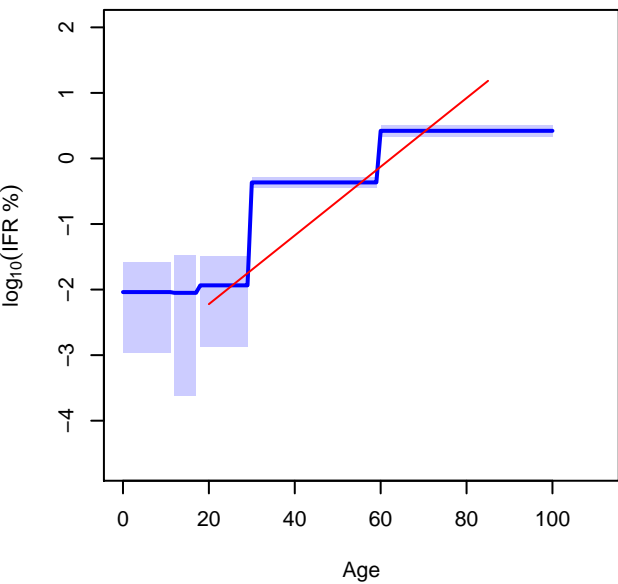

**73: Sao Paulo City, Brazil**

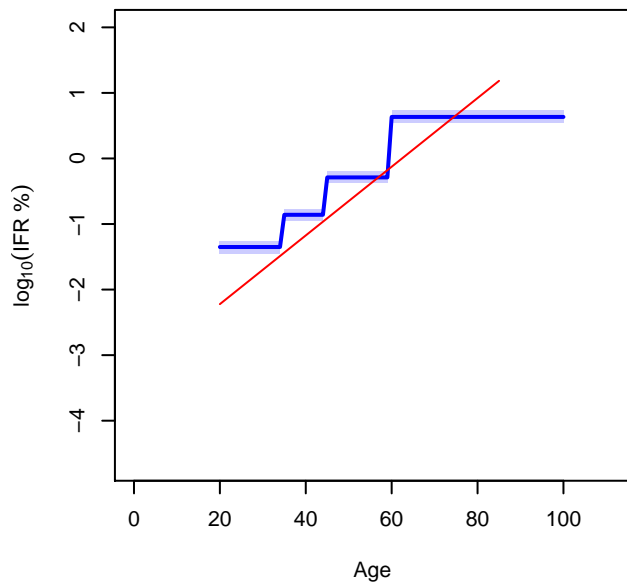

**121: Wuhan #1, China**

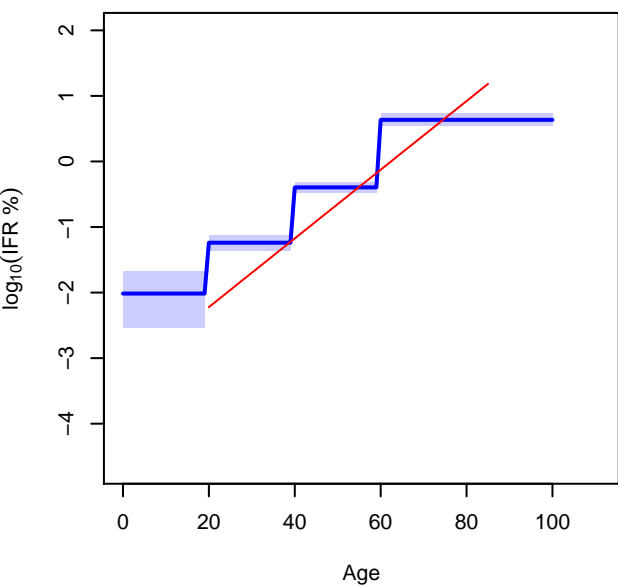

**148: Córdoba: 8 cities, Colombia**

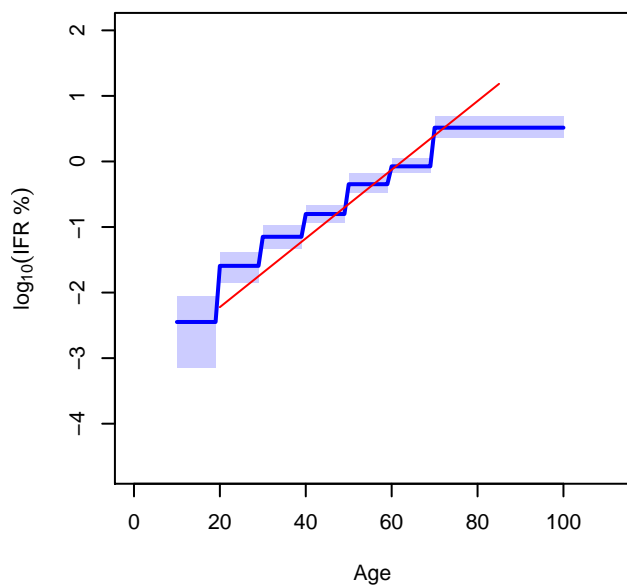

**156: National Study, Jordan**

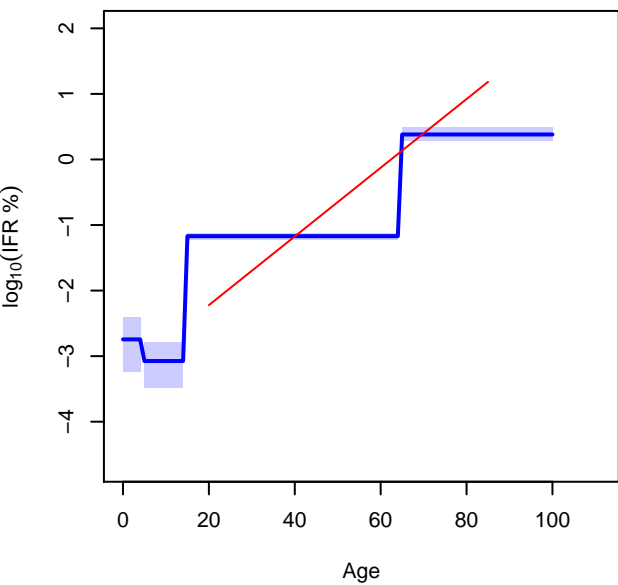

**192: National Study, Hungary**

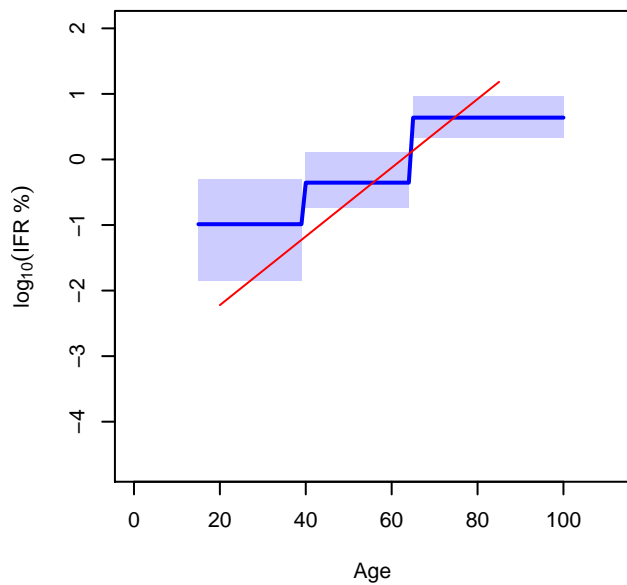

**209: Cuiabá, Mato Grosso, Brazil**

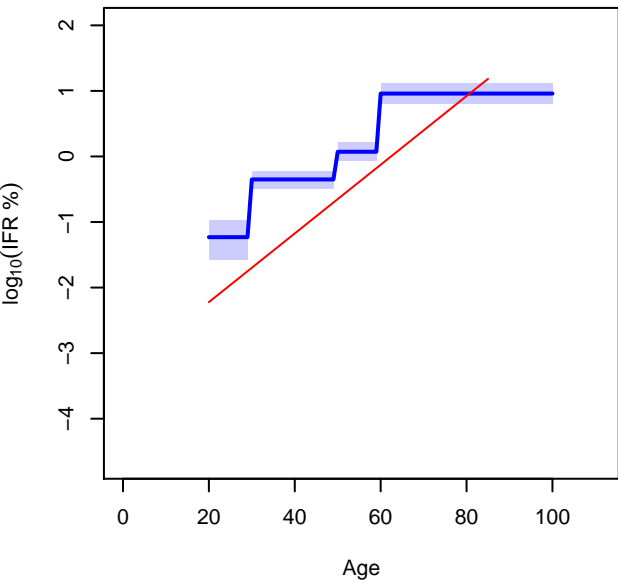

**216: Várzea Grande, Mato Grosso, Brazil**

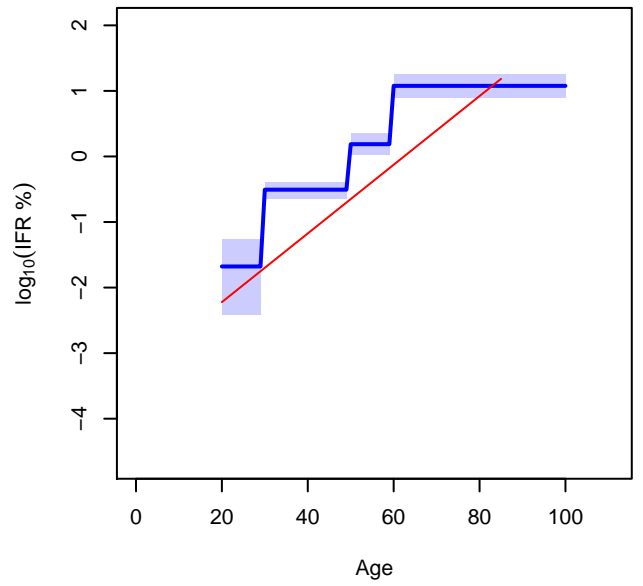

**221: Asunción + Central Department, Paraguay**

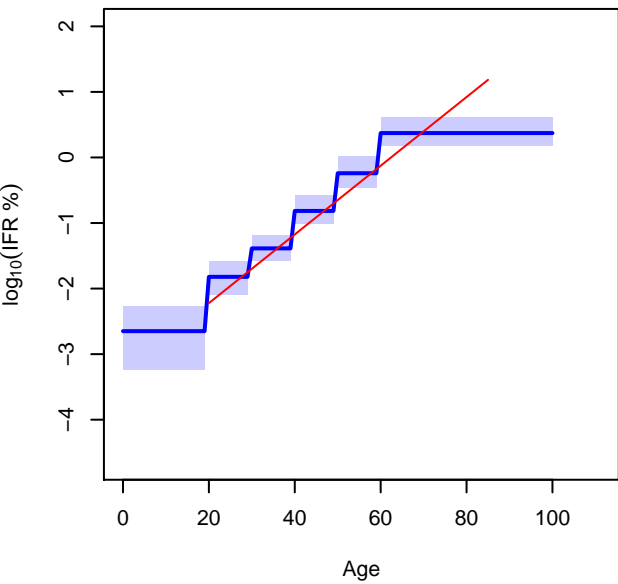

Supplement: Supplementary file [file media-2.pdf]
