# Supplementary material for: Assessing the Burden of COVID-19 in Developing Countries: Systematic Review, Meta-Analysis, and Public Policy Implications
Source: bioRxiv or medRxiv preprint supplement (doi:10.1101/2021.09.29.21264325), 2022-03-01

**5: Maranhao, Brazil**

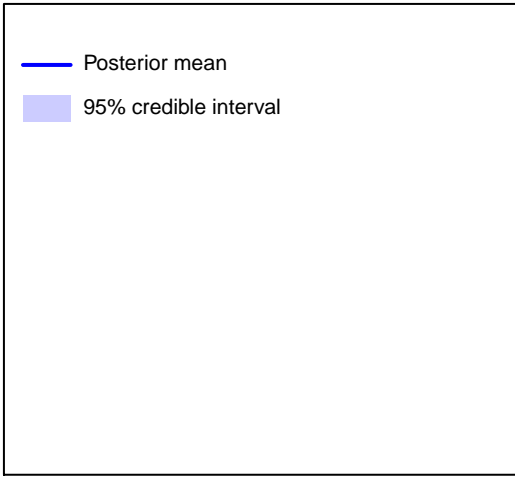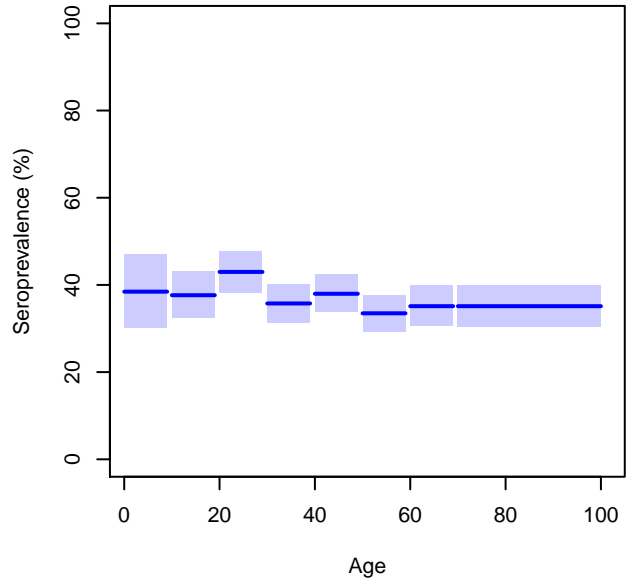

**11: Delhi, India**

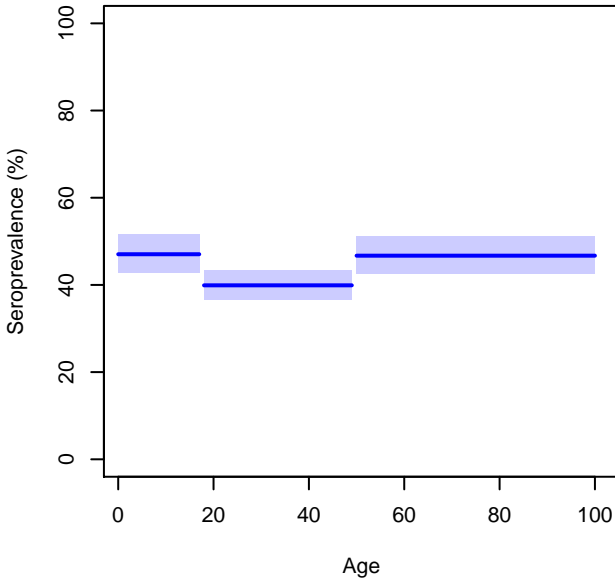

**12: Karnataka, India**

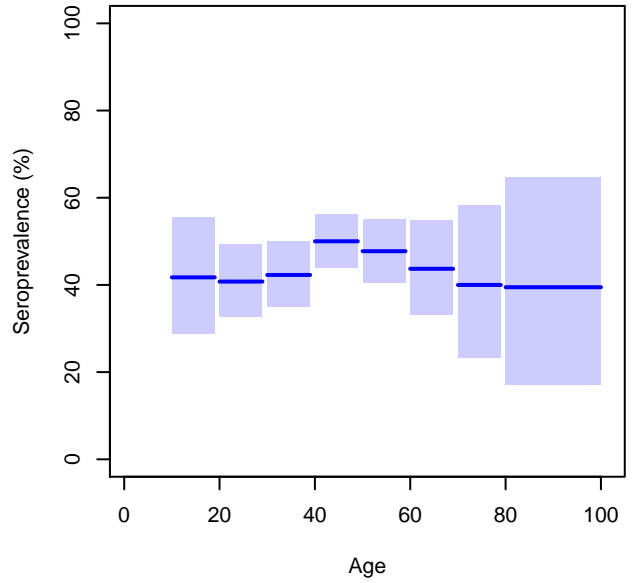

**13: Pimpri-Chinchwad, India**

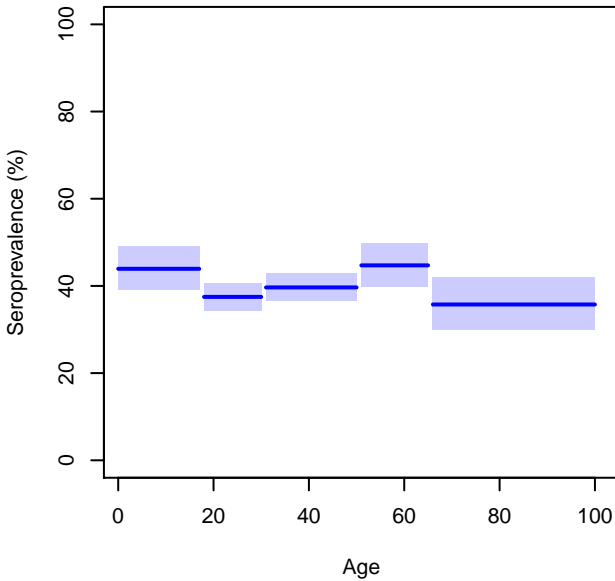

**16: Puducherry, India**

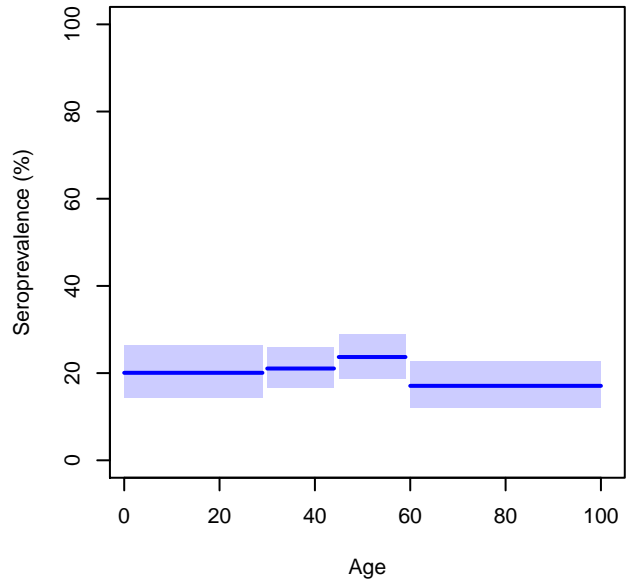

**18: West Bengal (only Paschim Medinipur), India**

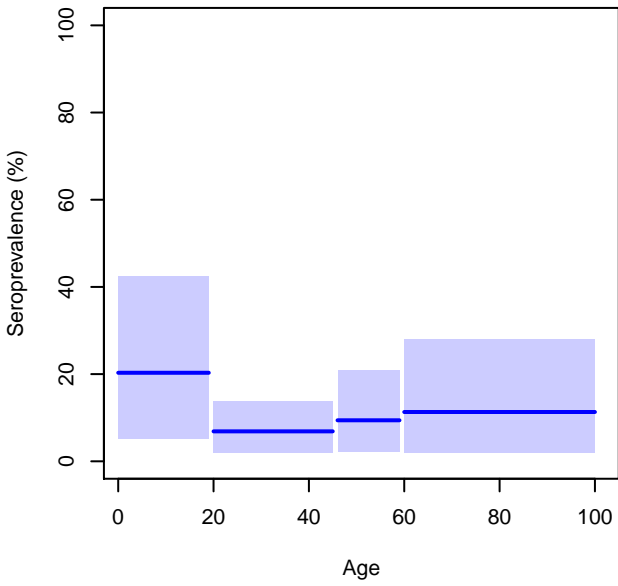

**19: Chennai, India**

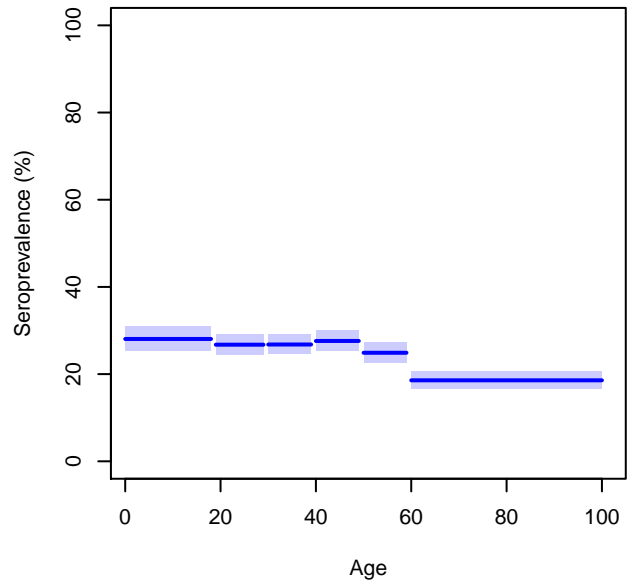

**24: Maputo city, Mozambique**

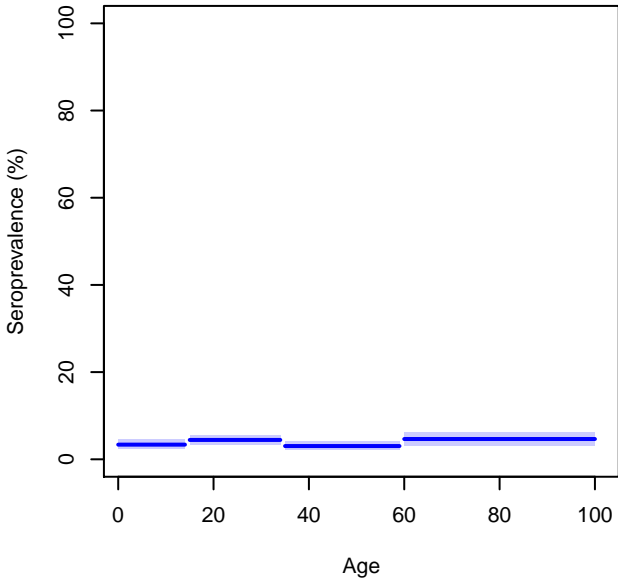

**36: Nairobi County, Kenya**

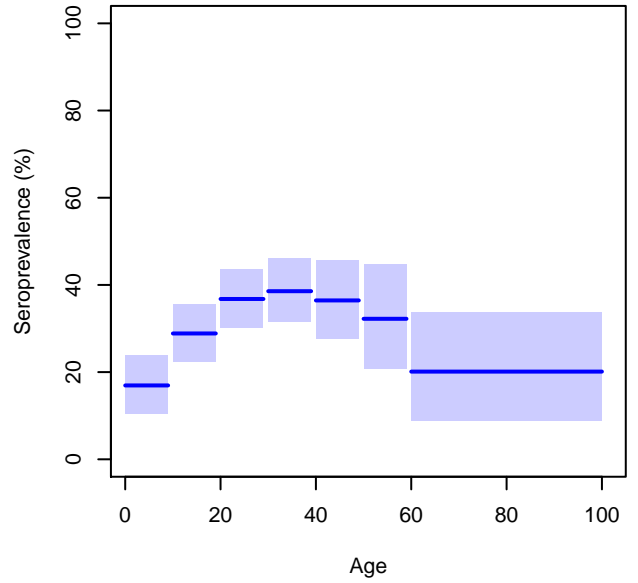

**38: Buenos Aires City, Argentina**

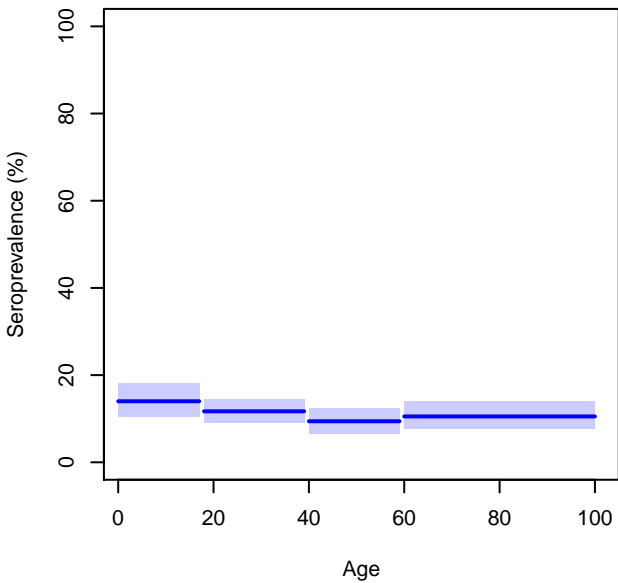

**40: Municipality of Hurlingham, Argentina**

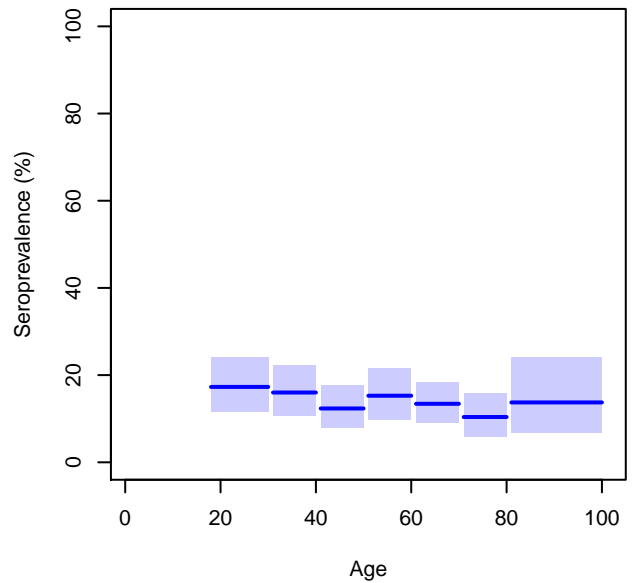

**42: Santa Cruz, Bolivia**

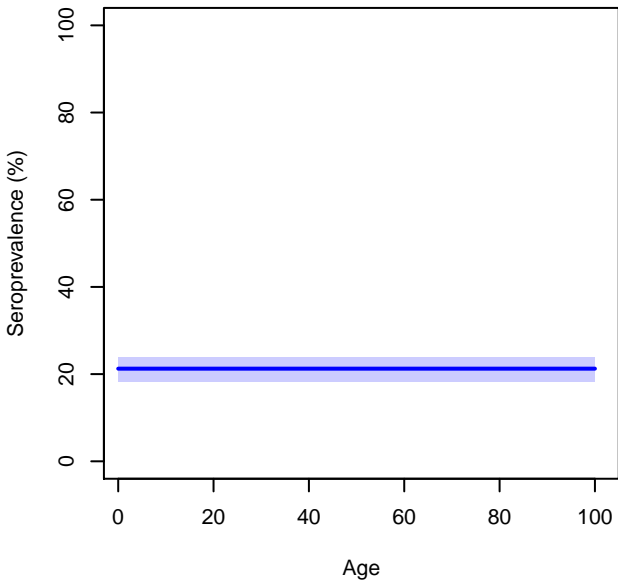

**44: Leticia, Colombia**

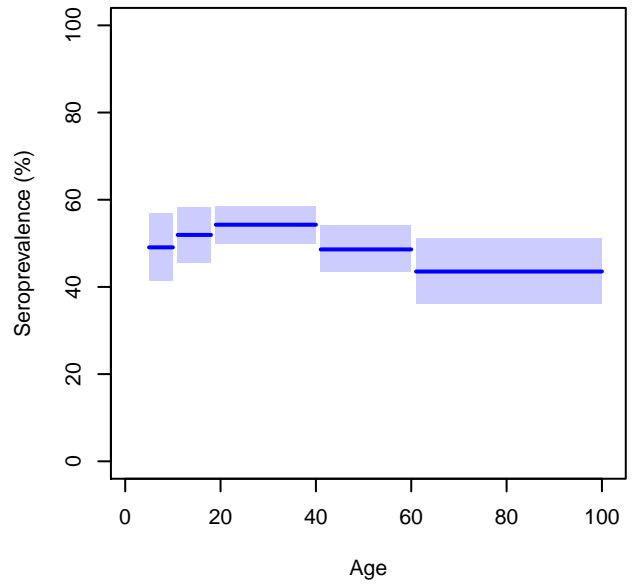

**45: Barranquilla, Colombia**

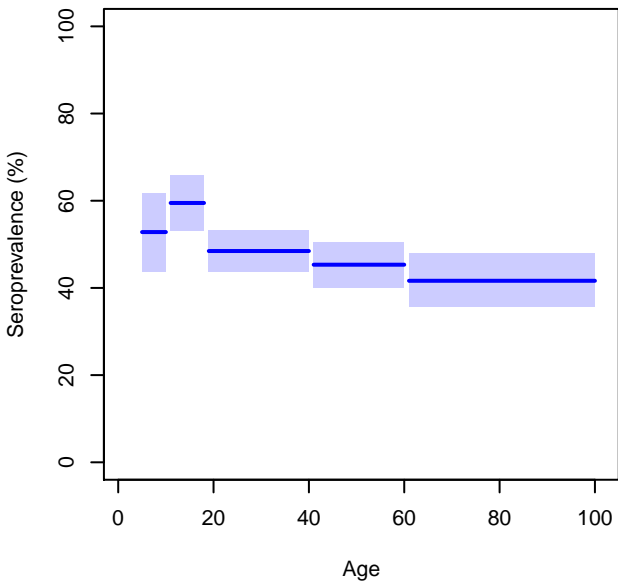

**46: Medellín, Colombia**

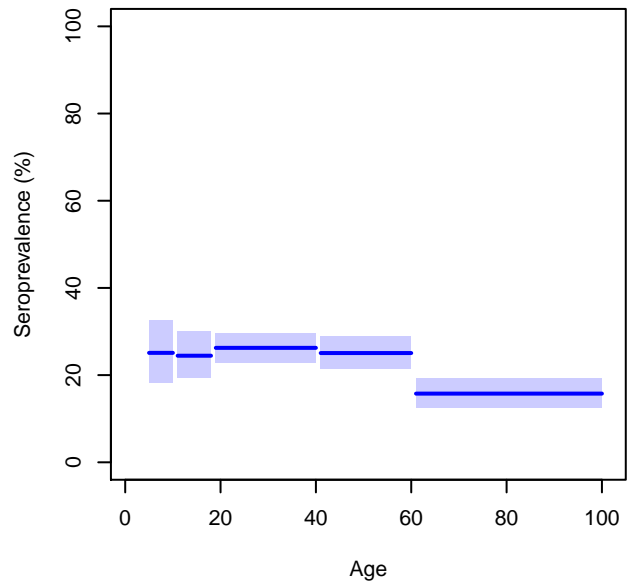

**48: Bucaramanga, Colombia**

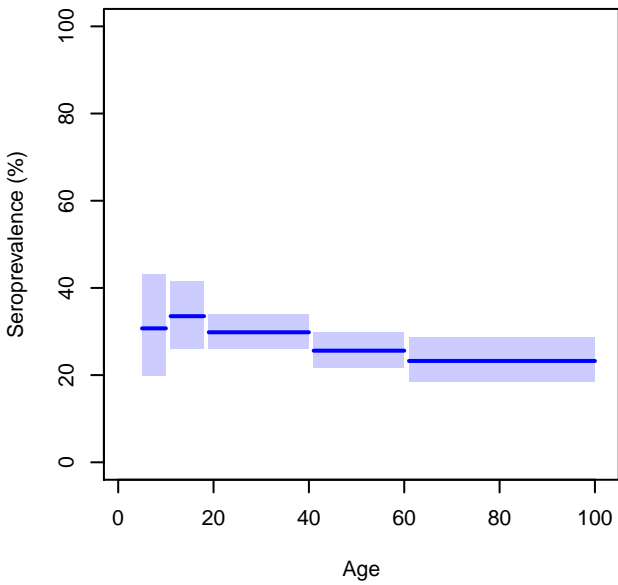

**49: Cucuta, Colombia**

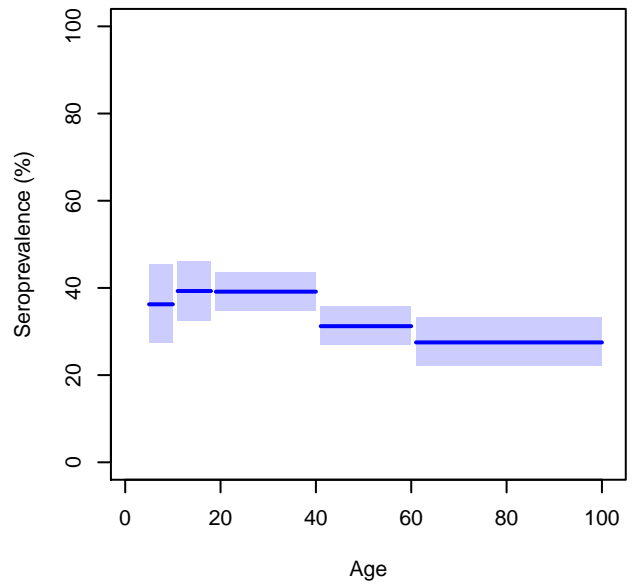

**50: Villavicencio, Colombia**

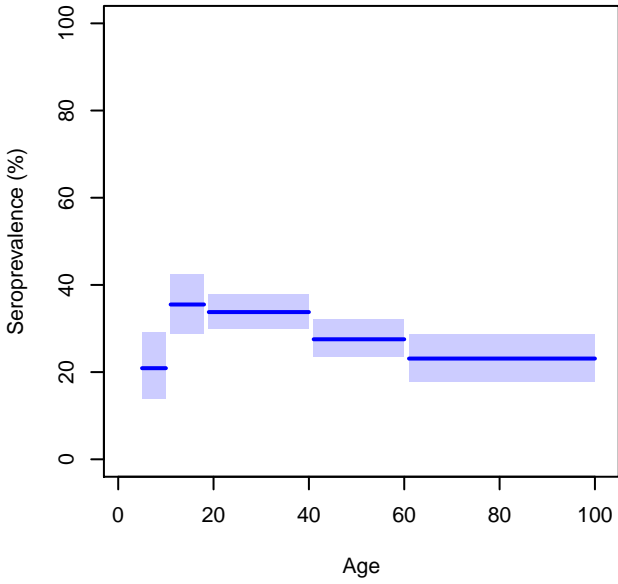

**51: Bogotá, Colombia**

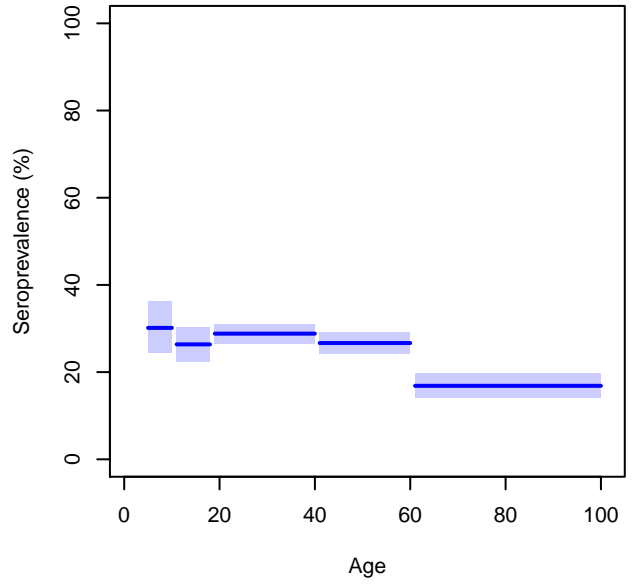

**52: Cali, Colombia**

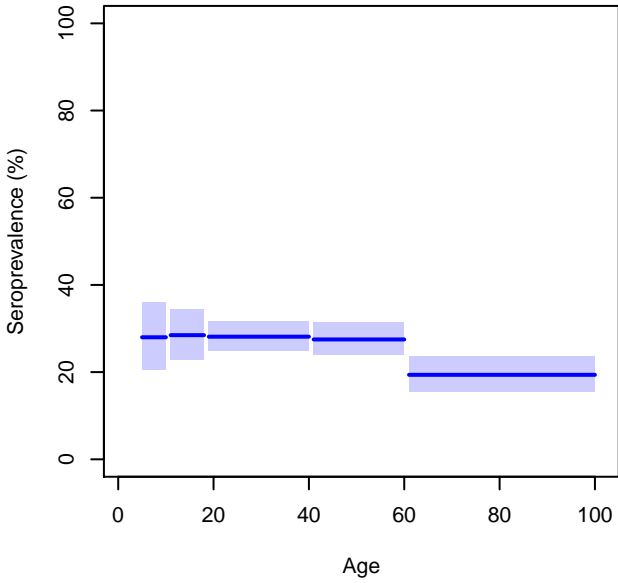

**54: Ipiales, Colombia**

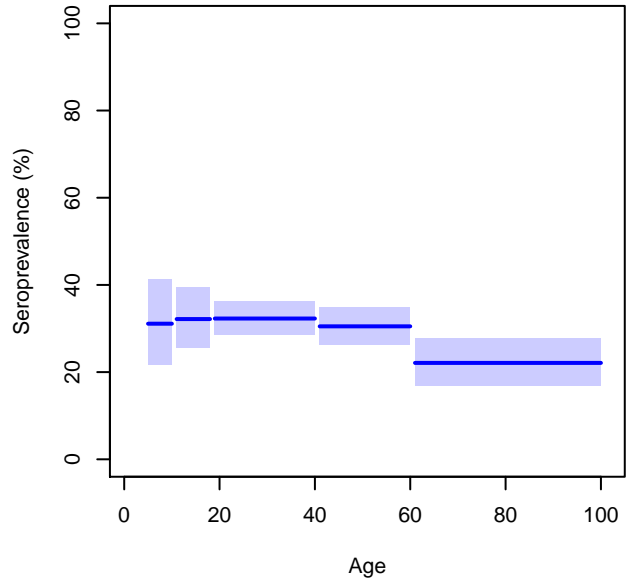

**59: Cusco Province, Peru**

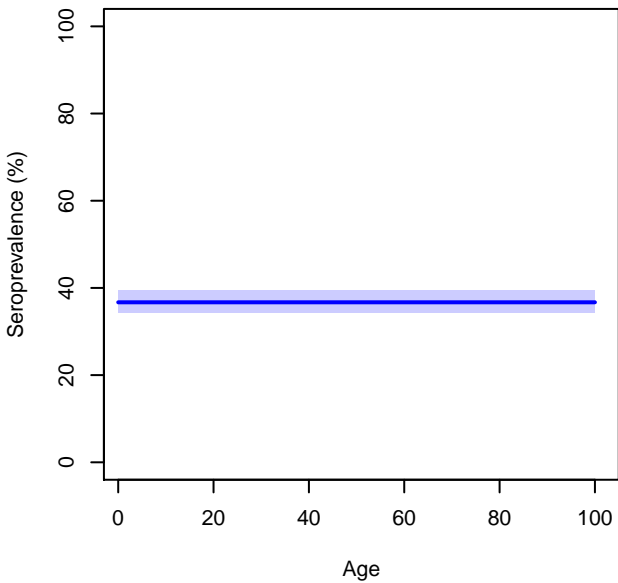

**60: Lambayeque, Peru**

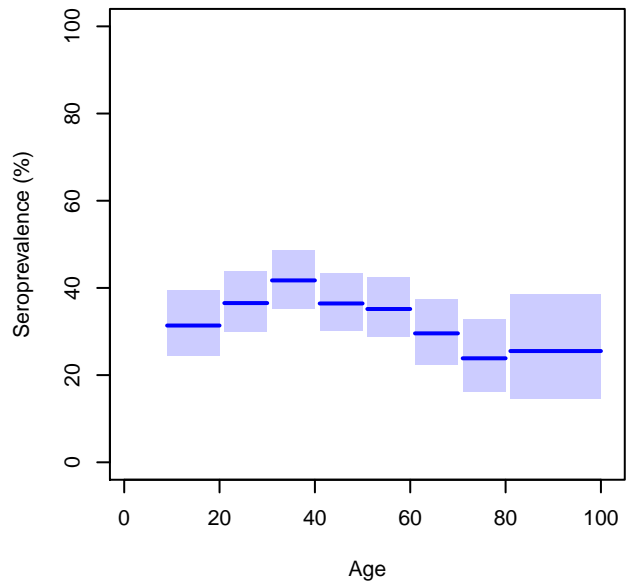

**63: Lima (Metropolitana) + Callao, Peru**

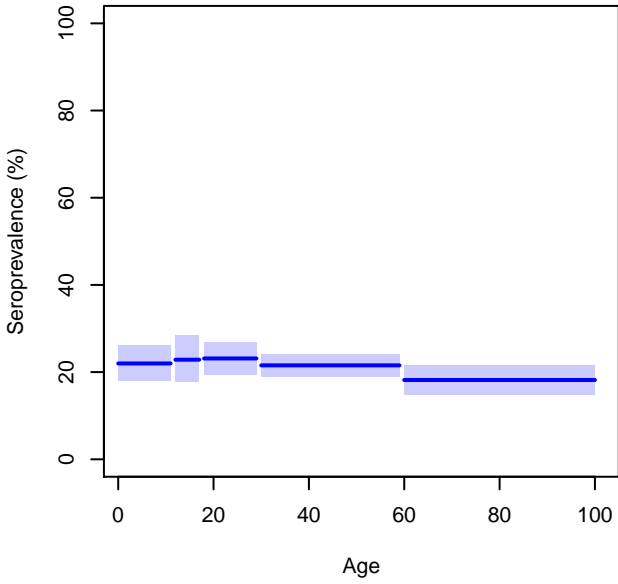

**64: Iquitos, Loreto, Peru**

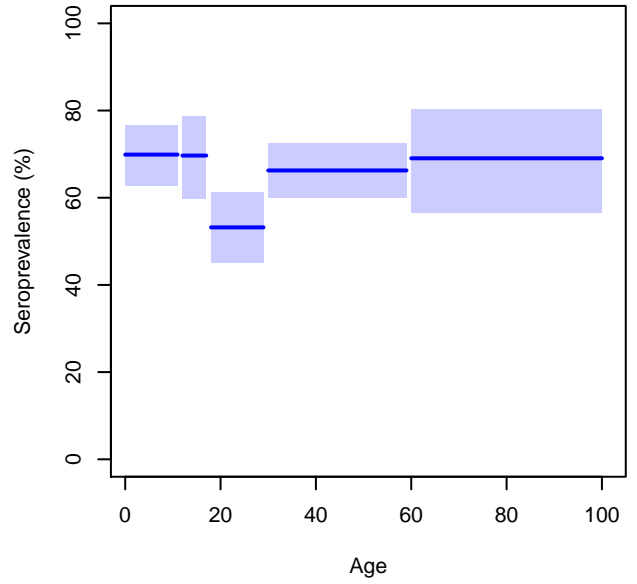

**73: Sao Paulo, Brazil**

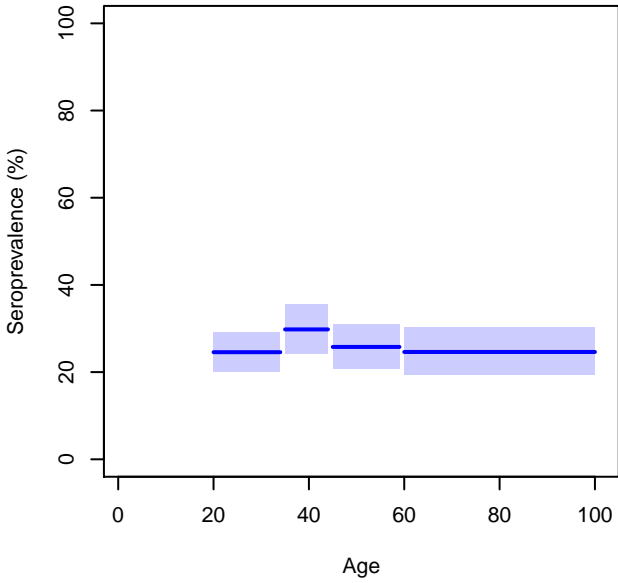

**74: Foz do Iguaçu, Brazil**

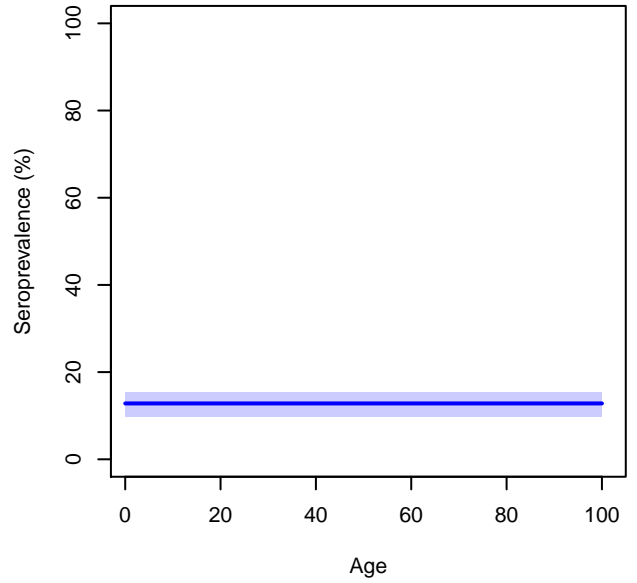

**77: Kashmir: Srinagar district, India**

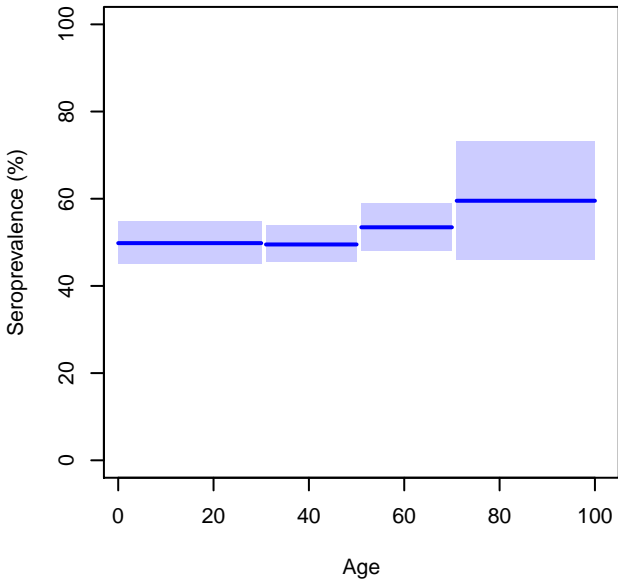

**78: National Study, Nepal**

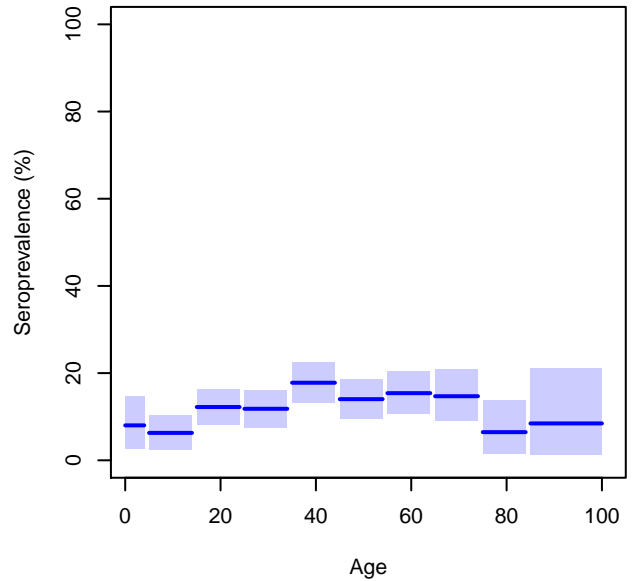

**80: Addis Ababa #2, Ethiopia**

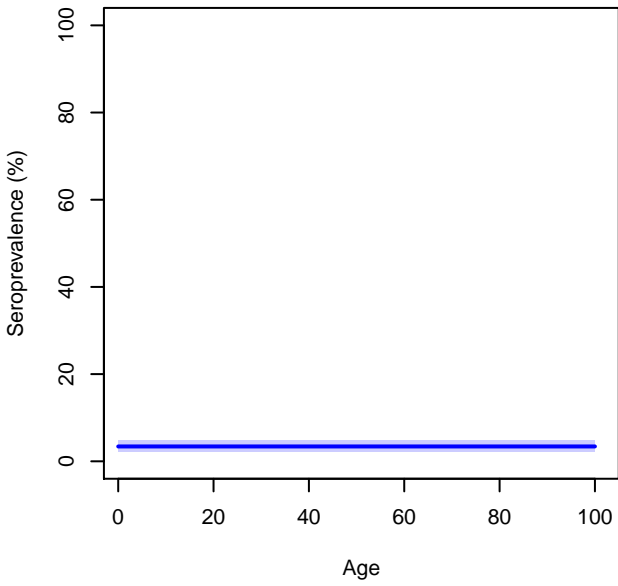

**81: National Study, Iran**

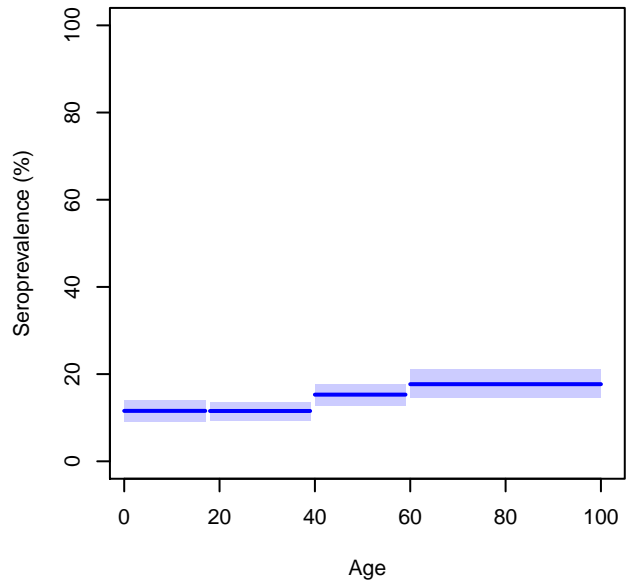

**82: National Study, Mexico**

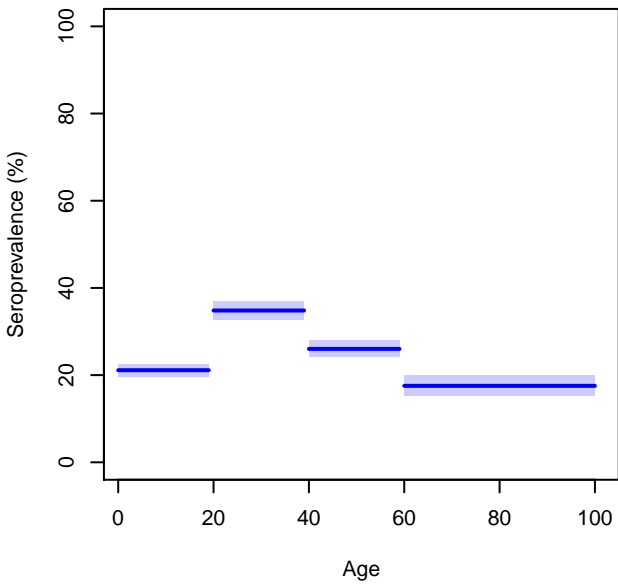

**83: Odisha: Bhubaneswar, India**

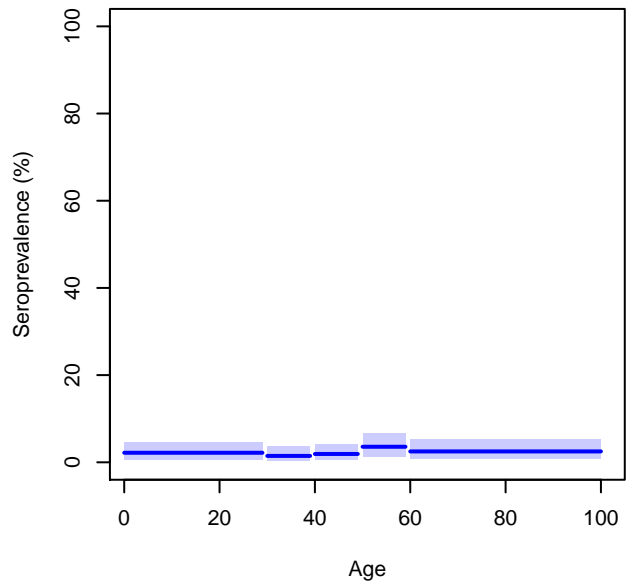

**84: Odisha: Berhampur, India**

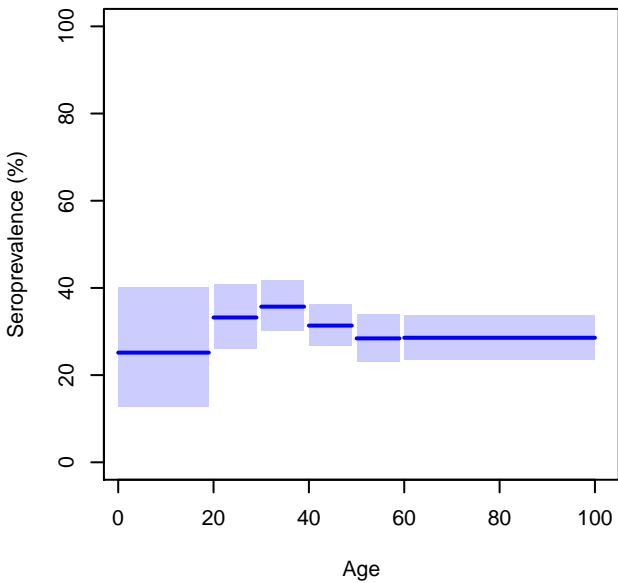

**90: Mitchells Plain, South Africa**

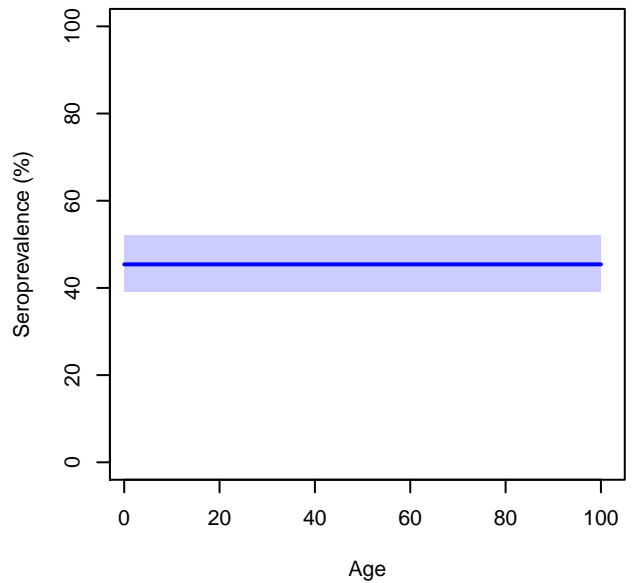

**98: Diredawa, Ethiopia**

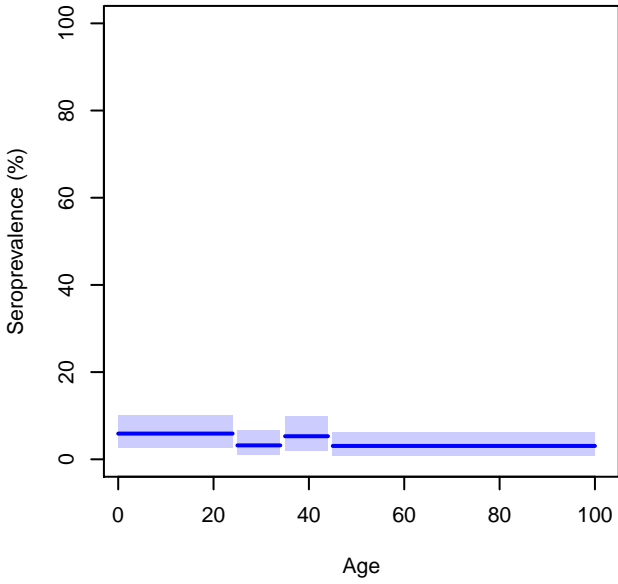

**102: Ndola + 5 other districts, Zambia**

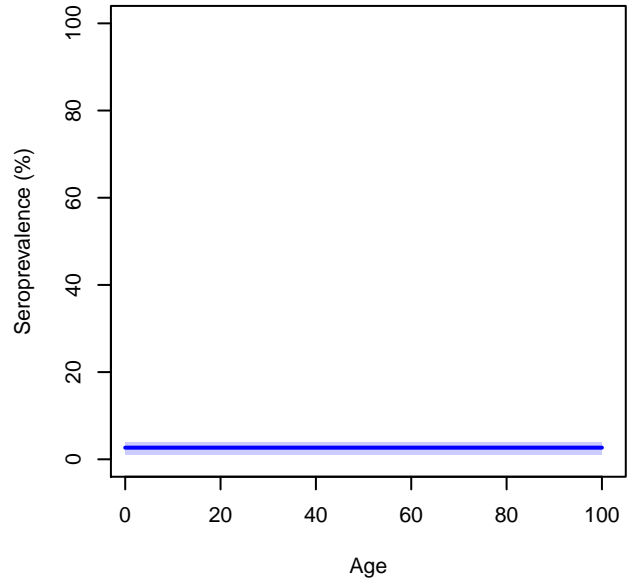

**120: St. Petersburg, Russia**

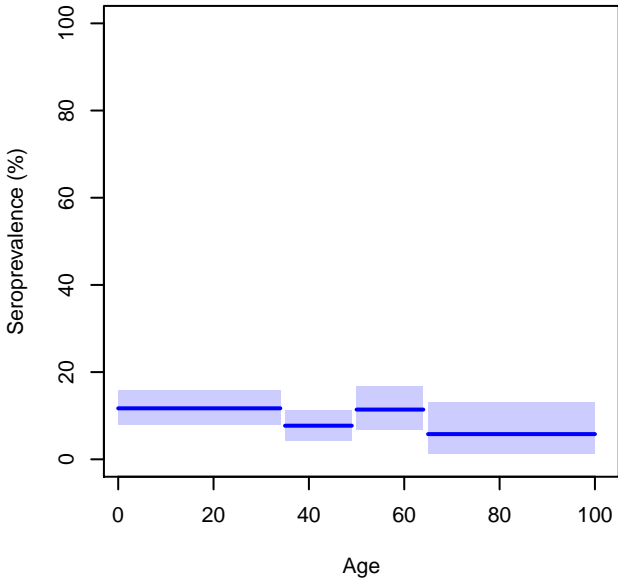

**121: Wuhan #1, China**

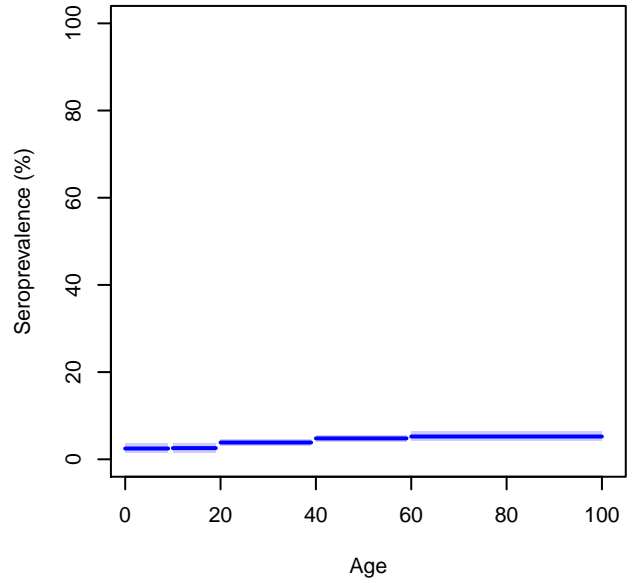

**123: Hubei province, China**

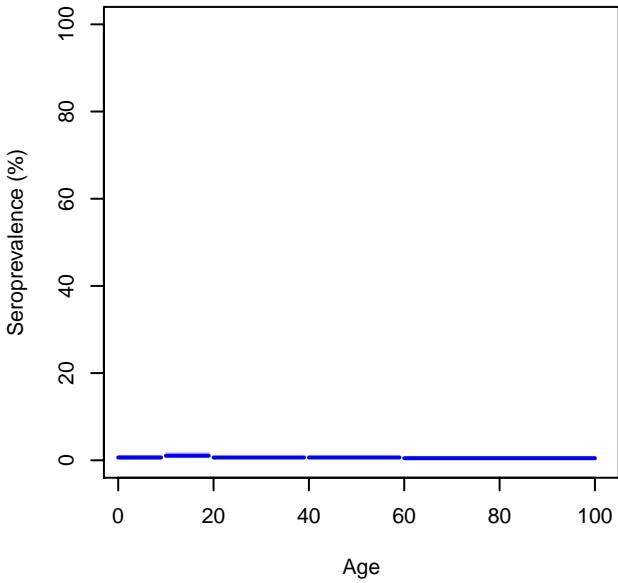

**125: Karachi, Pakistan**

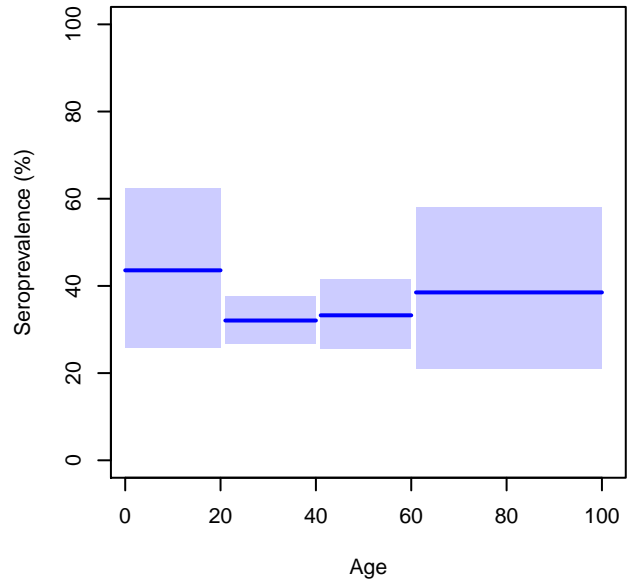

**126: Lahore, Pakistan**

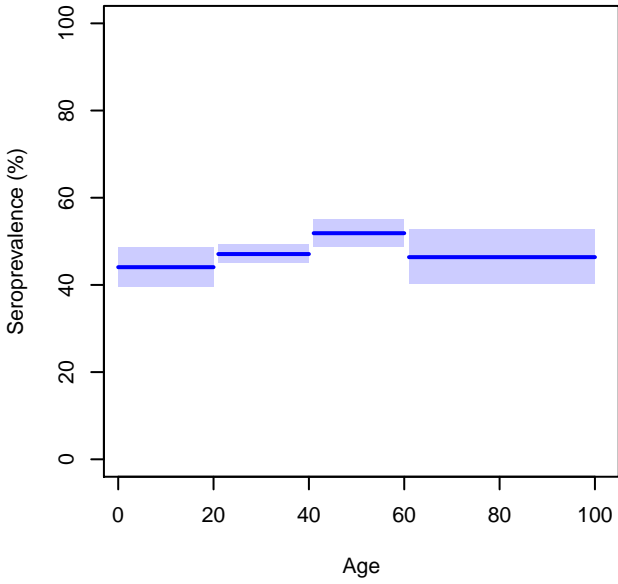

**140: Mumbai (3 wards, age-specific), India**

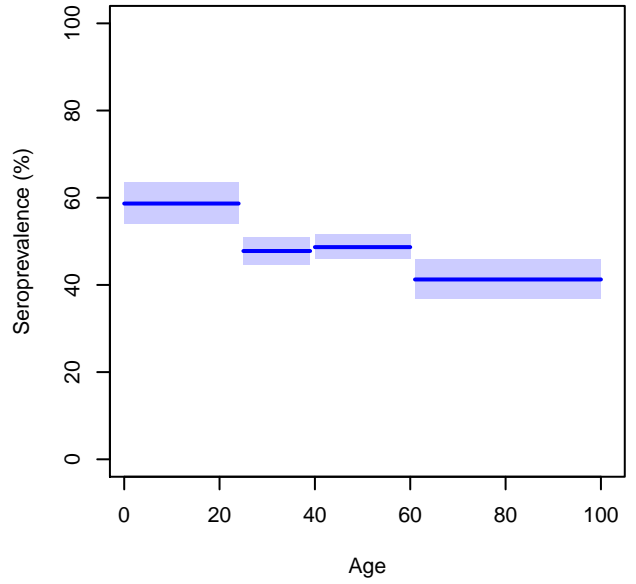

**144: Katowice region, Poland**

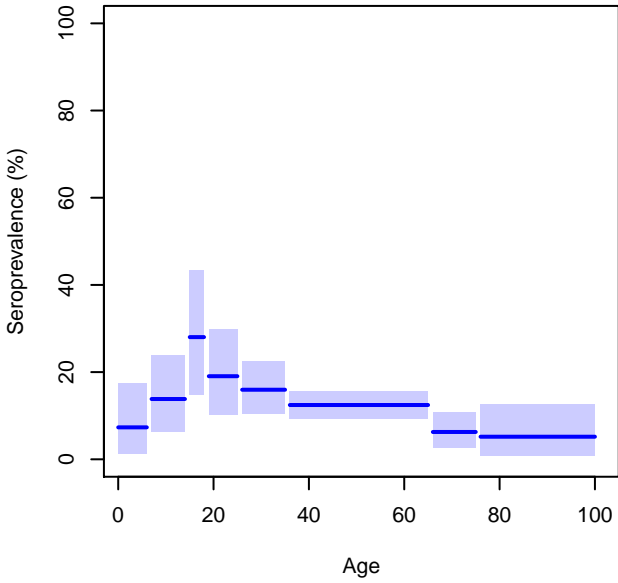

**148: Córdoba: 8 cities, Colombia**

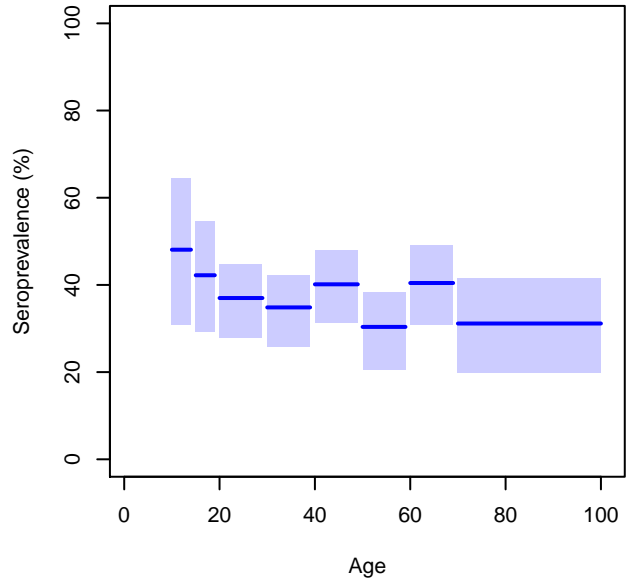

**156: National Study, Jordan**

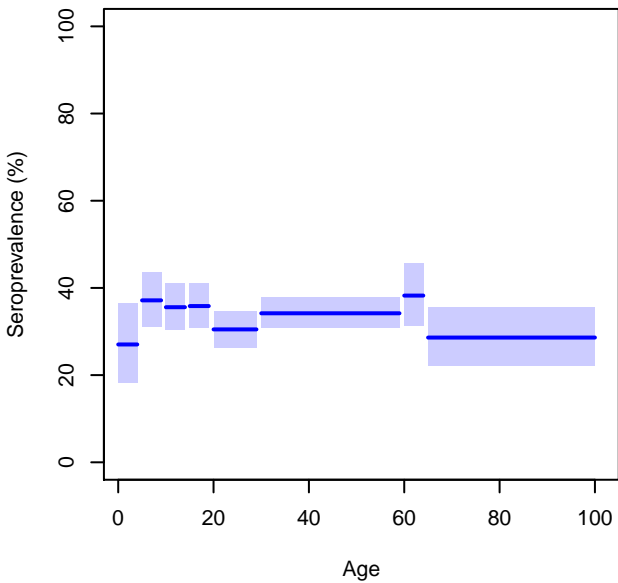

**192: National Study, Hungary**

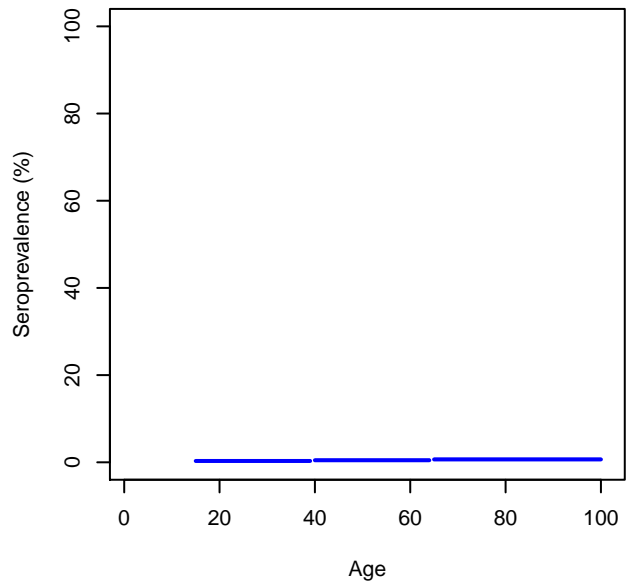



**201: Tamil Nadu (iFlash districts), India**

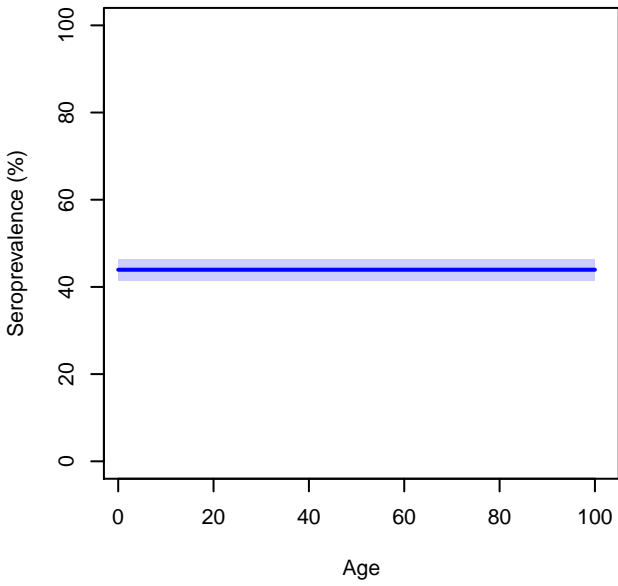

**202: Tamil Nadu (Vitros districts), India**

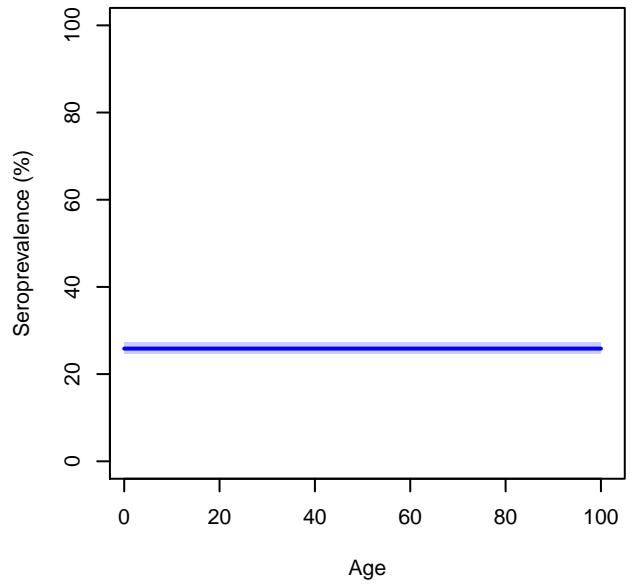

**203: Malegaon (city population), India**

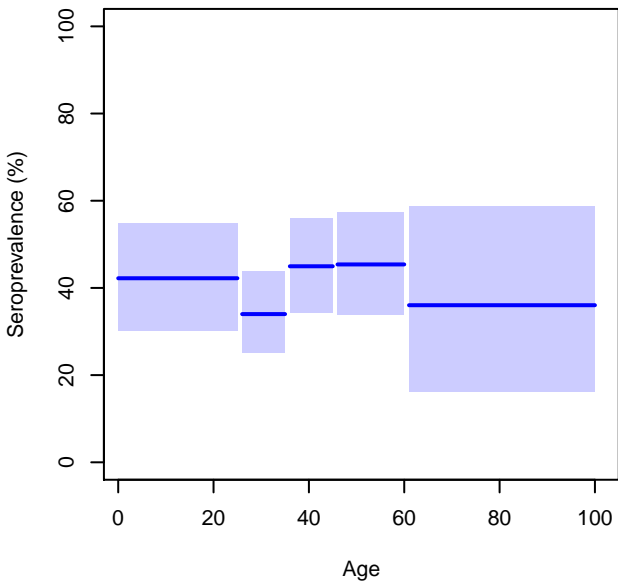

**209: Cuiabá, Mato Grosso, Brazil**

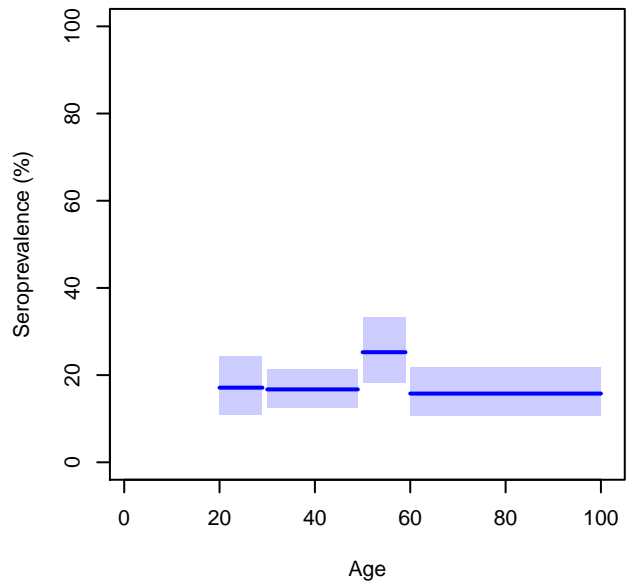

**216: Várzea Grande, Mato Grosso, Brazil**

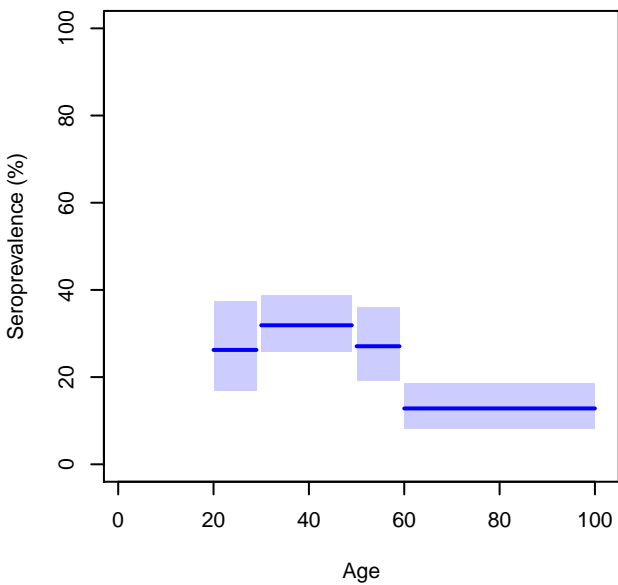

**218: Pitangueiras, Brazil**

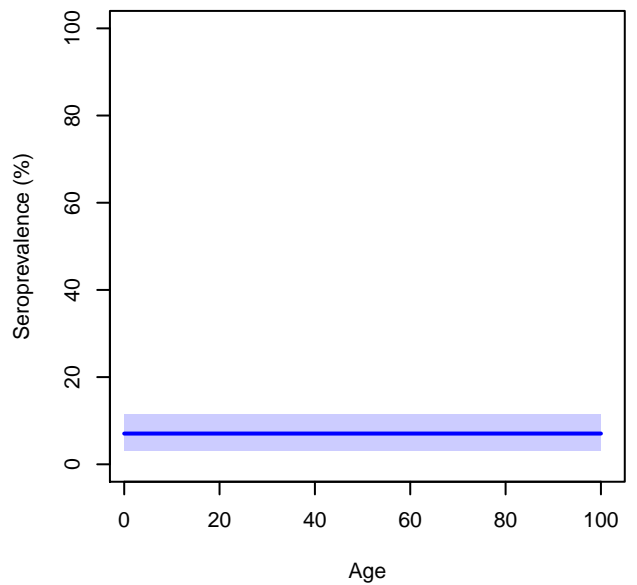

**220: Mato Grosso (8 cities), Brazil**

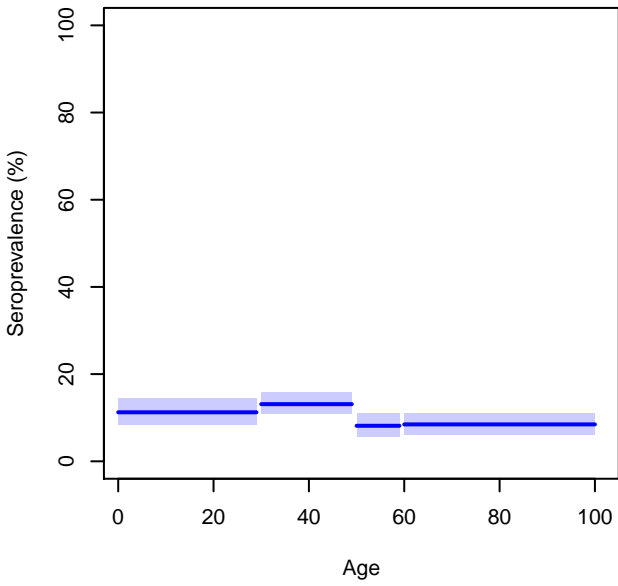

**221: Asunción + Central Department, Paraguay**

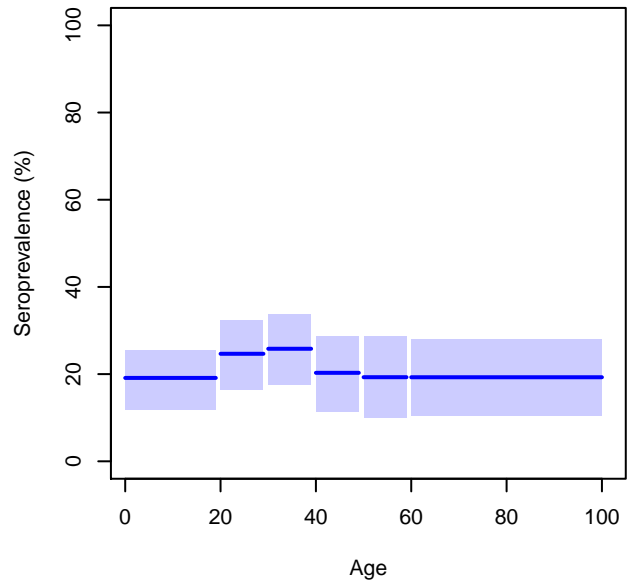

**17: Pune (five prabhags/subwards), India**

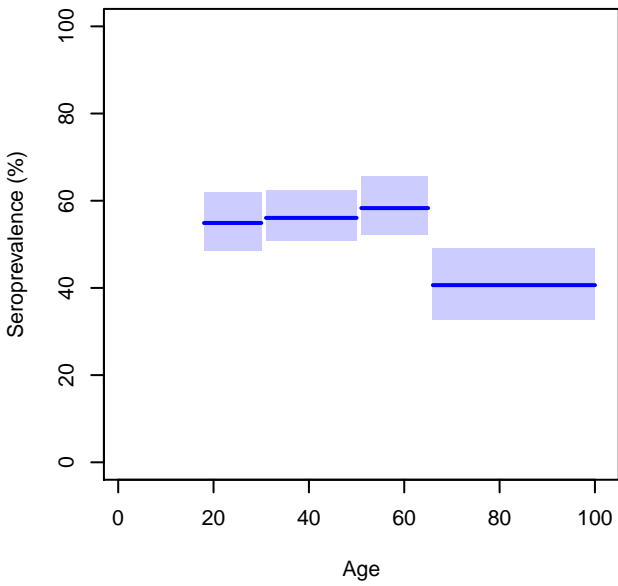

**22: Beira, Mozambique**

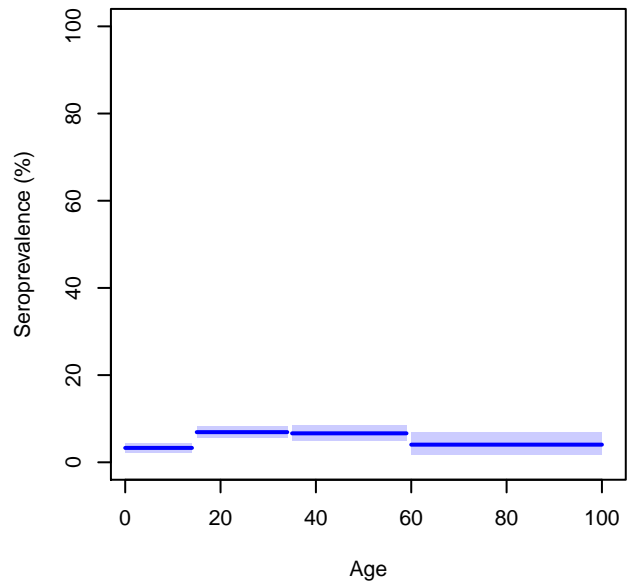

**25: Matola district, Mozambique**

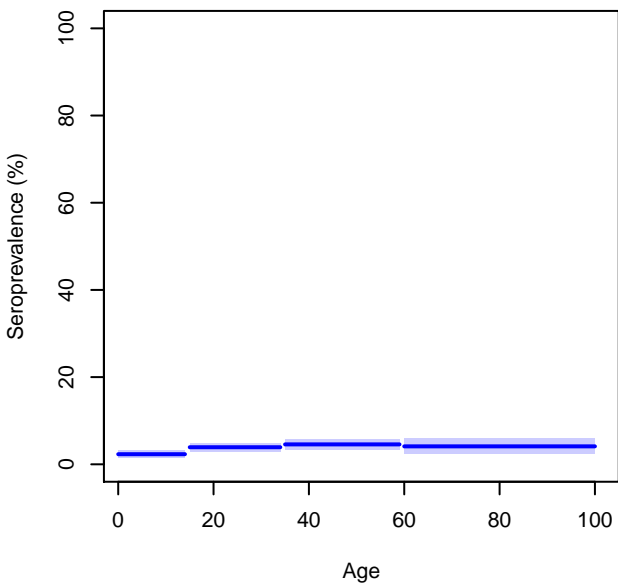

**26: Nampula, Mozambique**

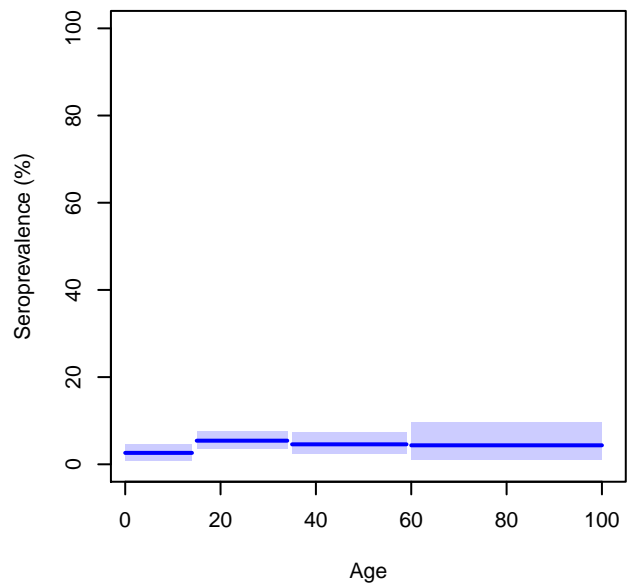

**27: Pemba, Mozambique**

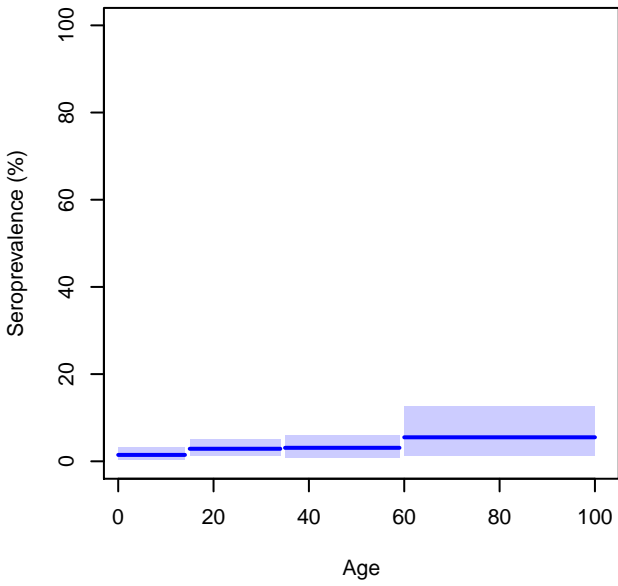

**28: Quelimane, Mozambique**

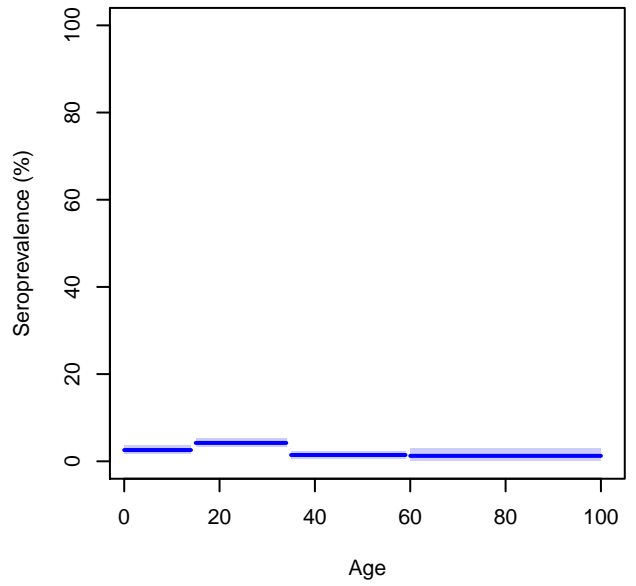

**29: Tete, Mozambique**

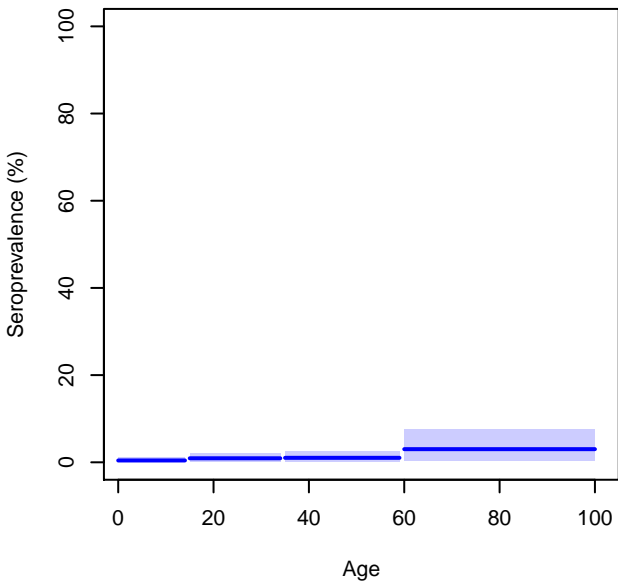

**30: Chimoio, Mozambique**

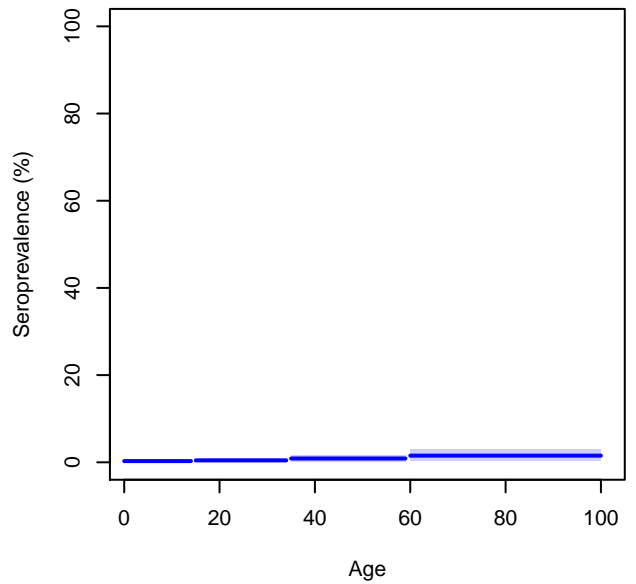

**31: Chókwè, Mozambique**

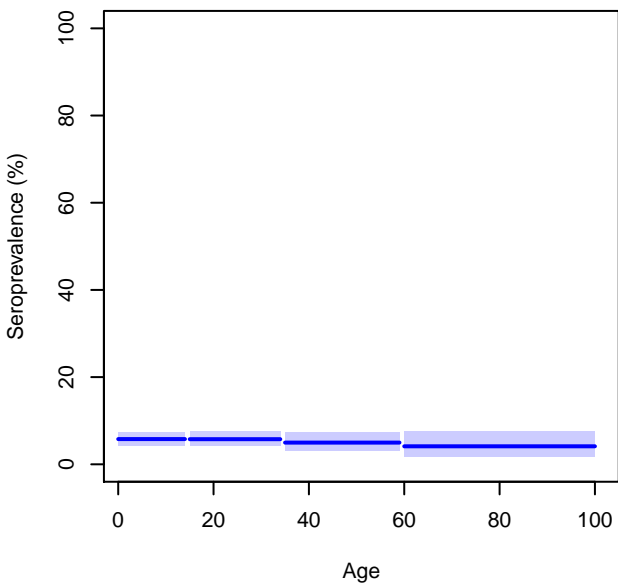

**32: Maxixe, Mozambique**

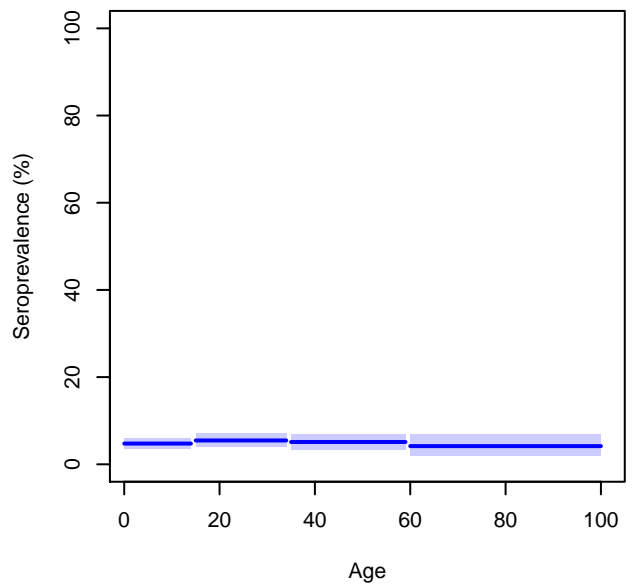

**33: Massinga, Mozambique**

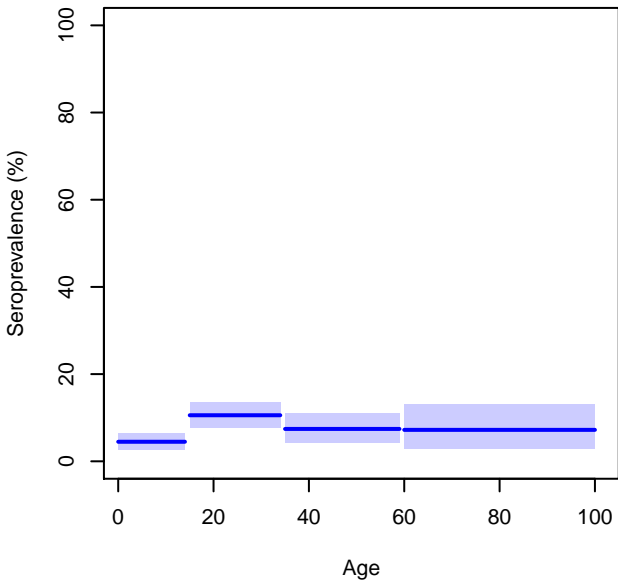

**34: Xai-Xai, Mozambique**

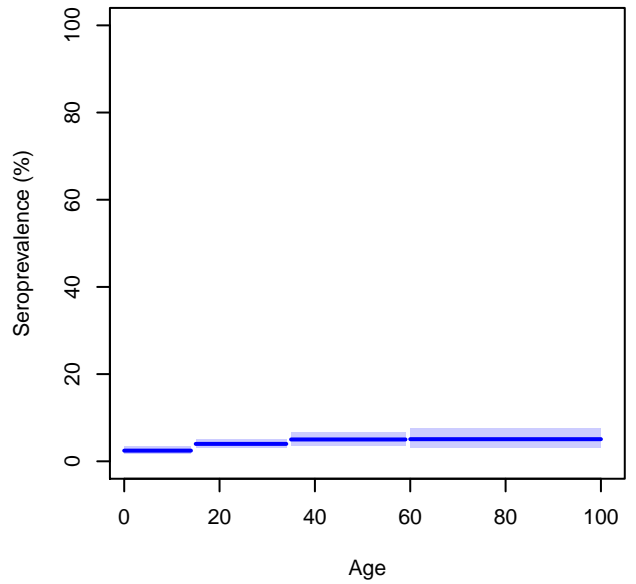

**37: Niger State, Nigeria**

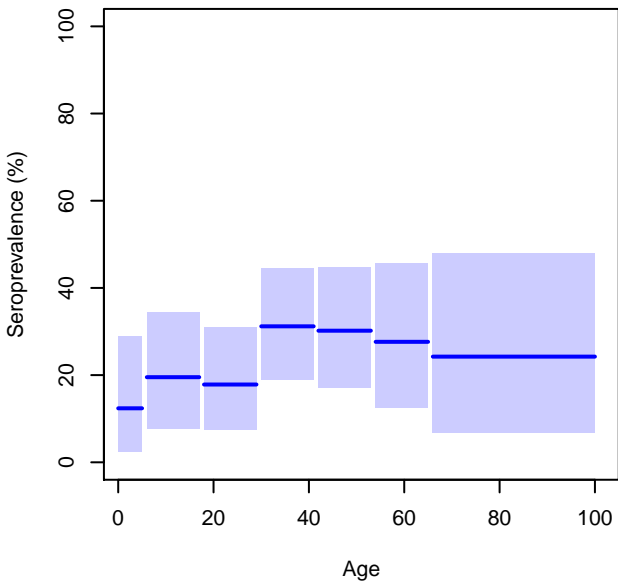

**55: 10 Provinces, Dominican Republic**

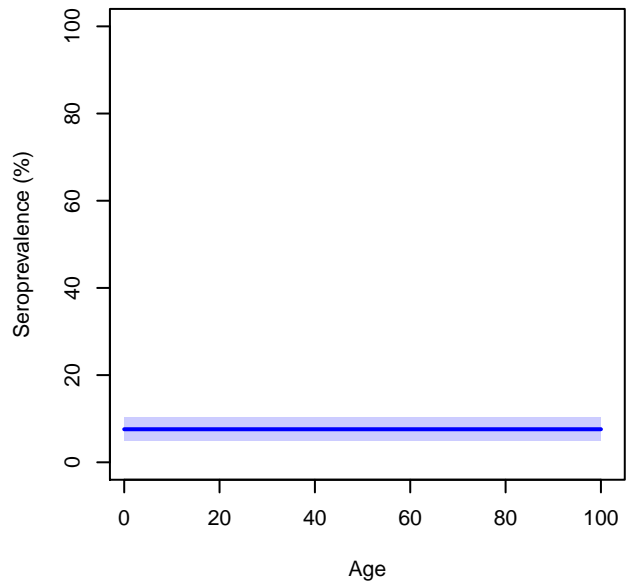

**58: Cuenca, Ecuador**

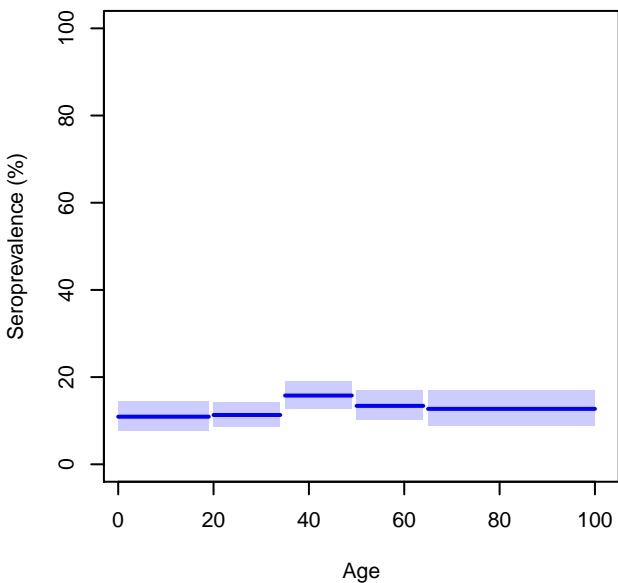

**88: Odisha: Rourkela, India**

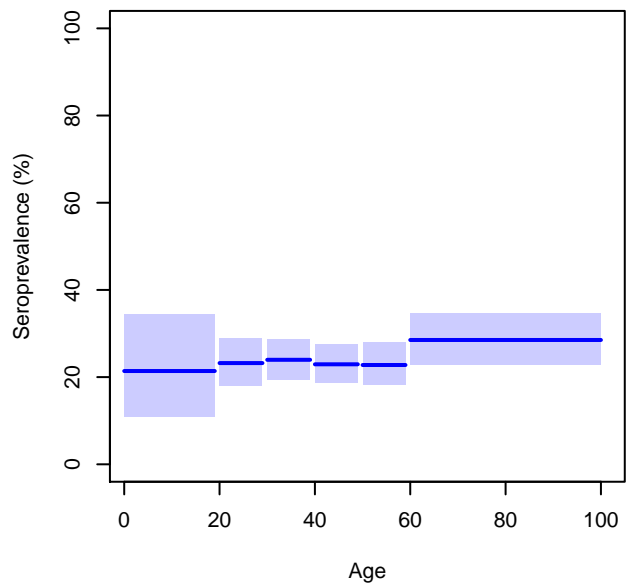

**94: Tirana (city, not county), Albania**

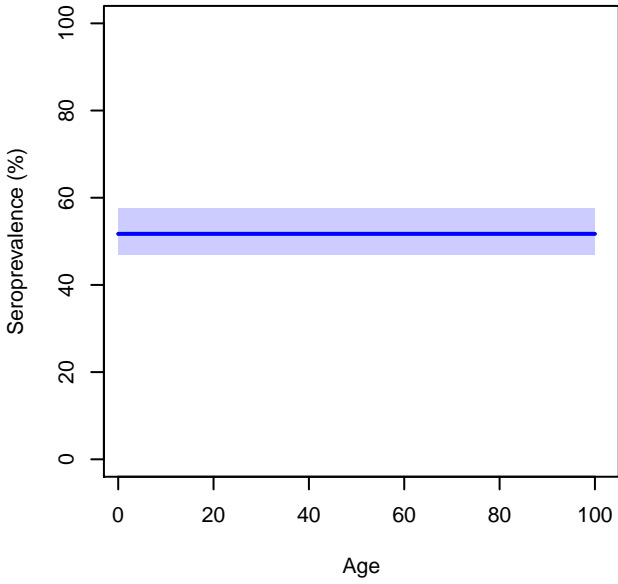

**96: Cité Verte (of Yaoundé), Cameroon**

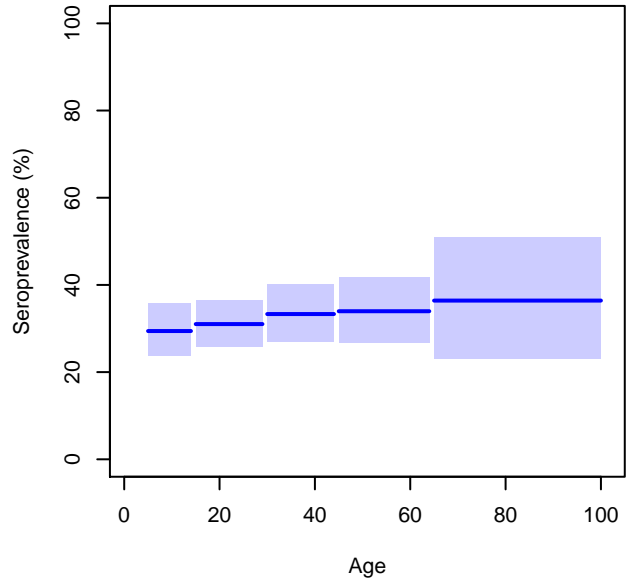

**97: Jimma town, Seka, Manna, Ethiopia**

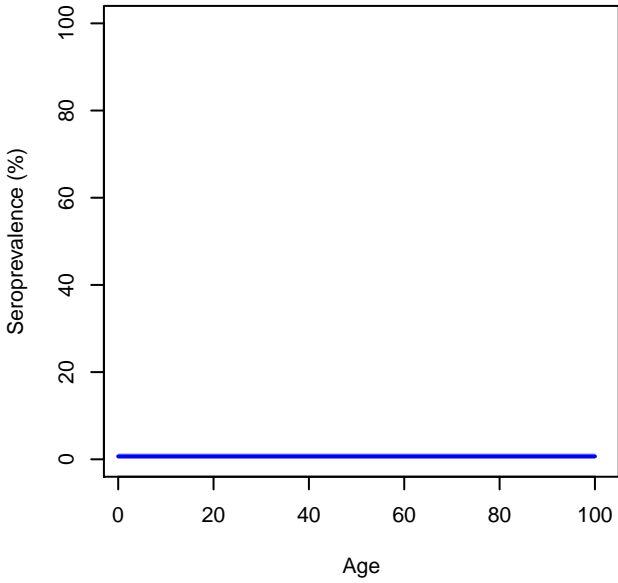

**100: Jouberton, South Africa**

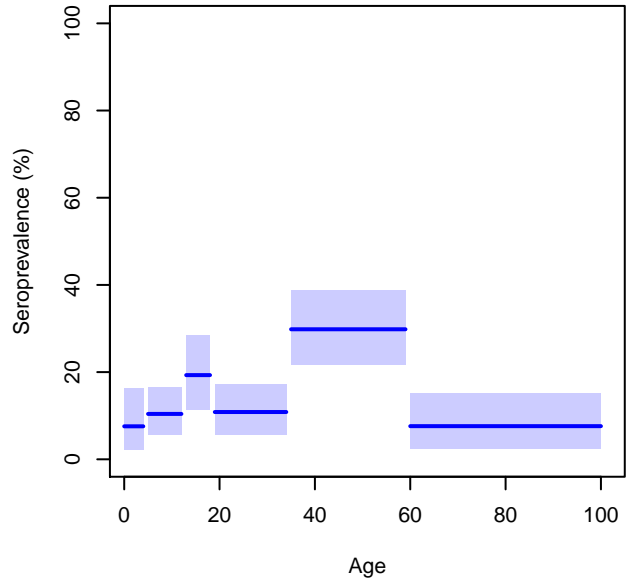

**101: Juba, South Sudan**

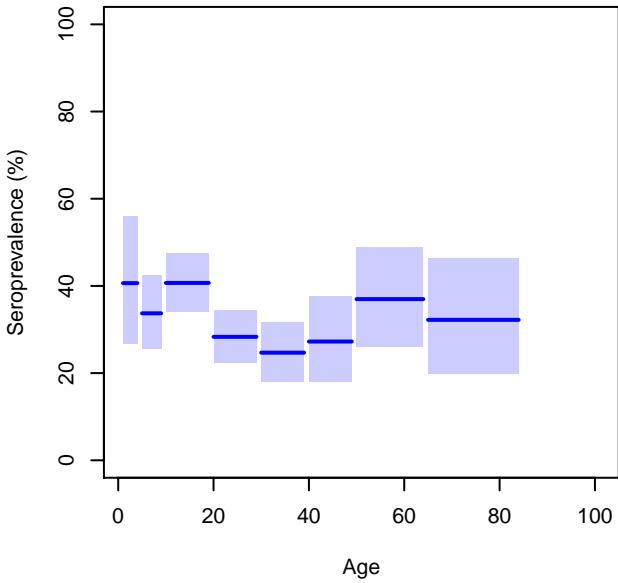

**105: Iraq: Duhok (city, not governorate), Iraq**

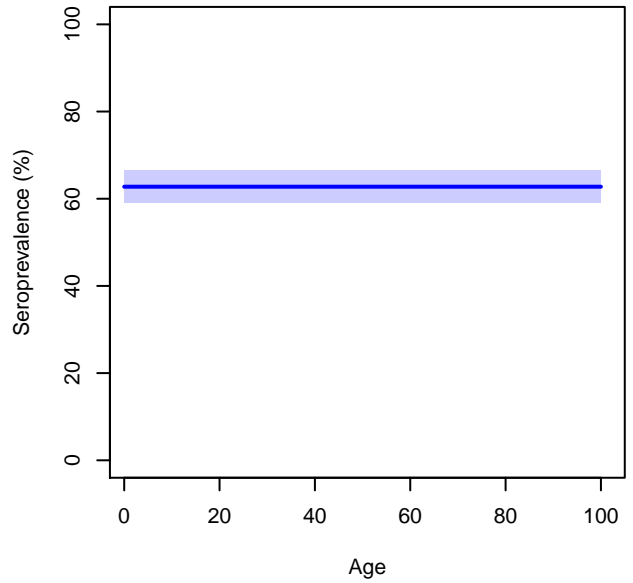

**107: 3 cities, United Arab Emirates**

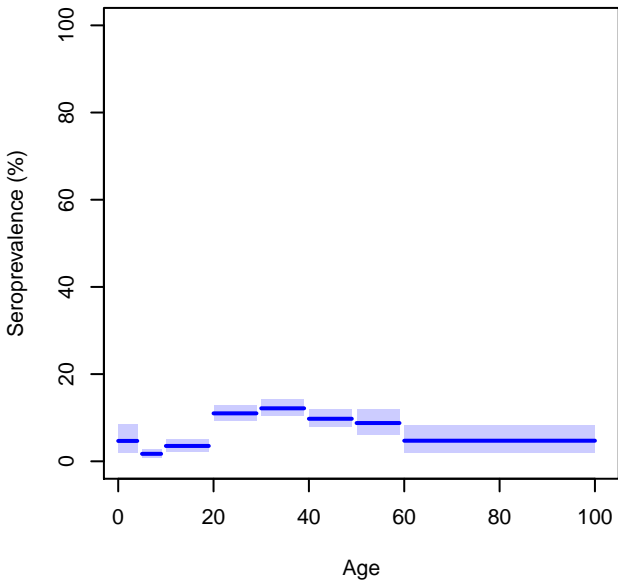

**108: Jabalpur (city, not district), India**

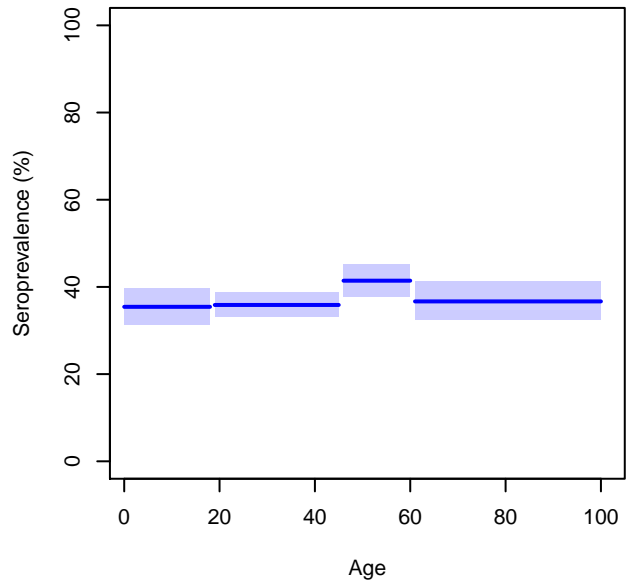

**122: Indore (city, not district), India**

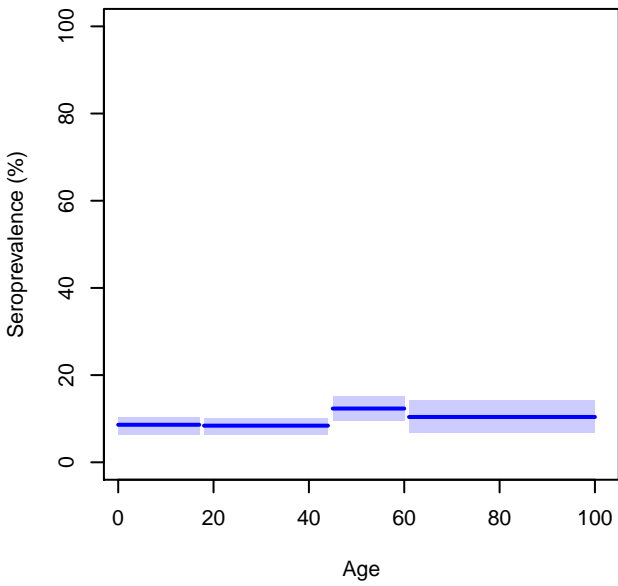

**124: 6 Provinces, China**

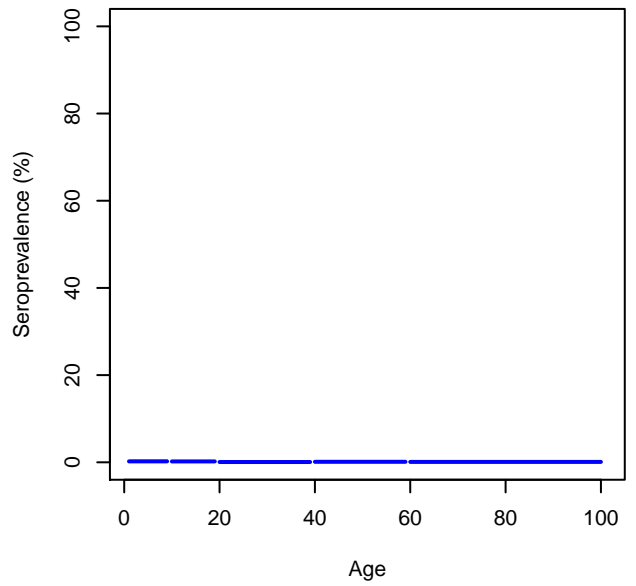

**128: Kinshasa, Democratic Republic of Congo**

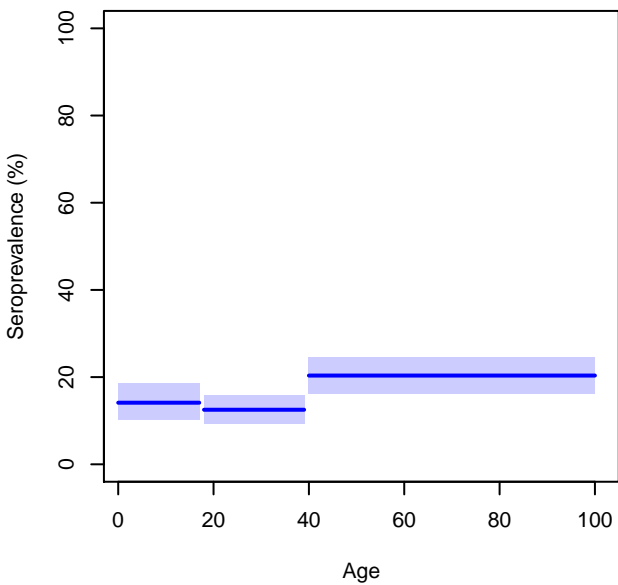

**129: Benghazi, Libya**

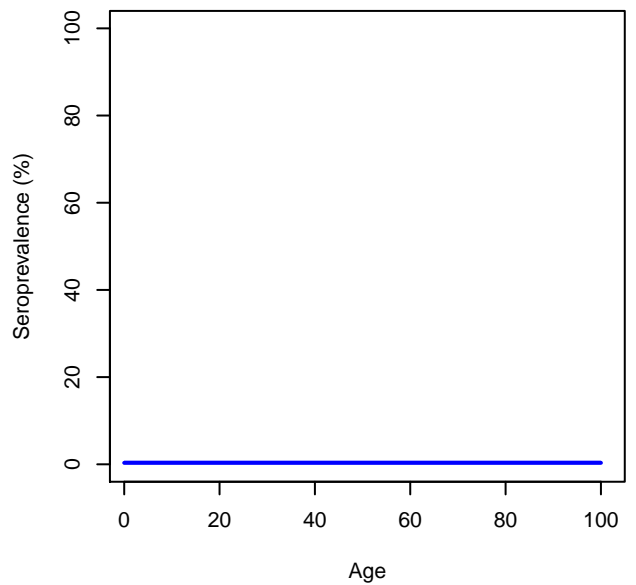

151: AMBA, Argentina

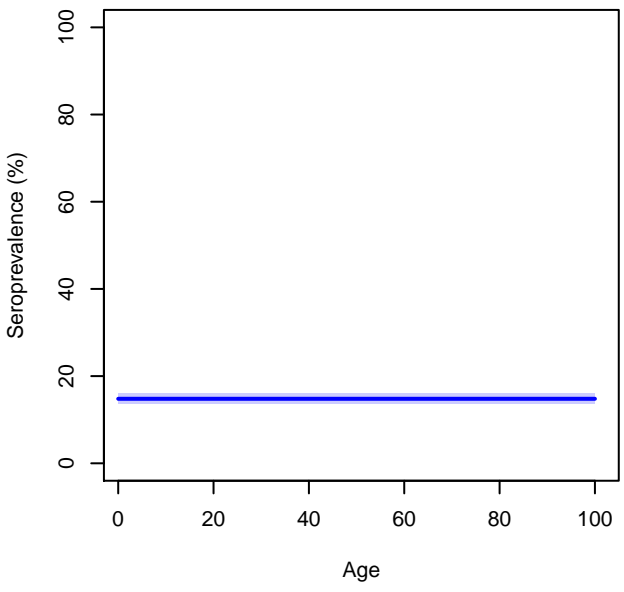

206: Hyderabad, India

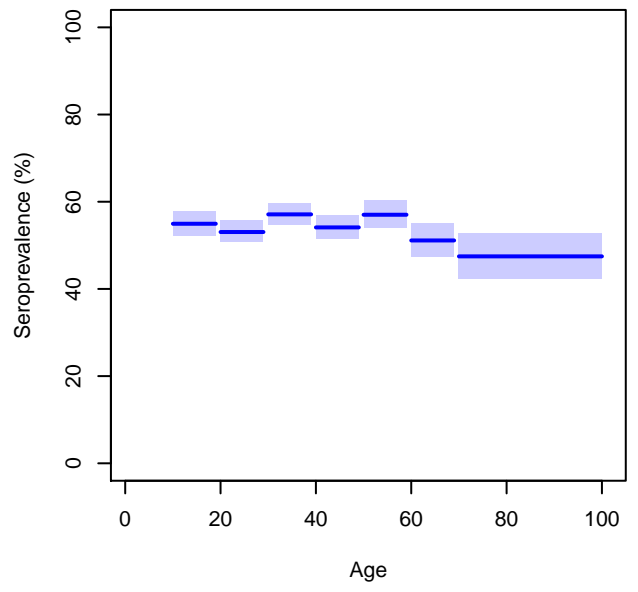

Supplement: Supplementary file [file media-3.pdf]
